# Supplementary material for: A radical coupling reaction of DMSO with sodium arylsulfinates in air : mild utilization of DMSO as C1 resource for the synthesis of arylsulfonyl dibromomethane
Source: Royal Society of Chemistry journal article supplement (doi:10.1039/c6ra01393g), 2016-01-01

# Supporting Information

## A Radical Coupling Reaction of DMSO with Sodium Arylsulfonates in Air: Mild Utilization of DMSO as C<sub>1</sub> Resource for the synthesis of arylsulfonyl dibromomethane

Jie Shi,<sup>#[a]</sup> Xiao-Dong Tang,<sup>#[b]</sup> Yan-Cheng Wu,<sup>[a]</sup> Jie-Fang Fang,<sup>[a]</sup> Liang Cao,<sup>[a]</sup> Xiao-Yun Chen,<sup>\*[c]</sup> and Zhao-Yang Wang<sup>\*[a]</sup>

<sup>#</sup>These authors contributed equally to this work.

[a] School of Chemistry and Environment, South China Normal University, Key Laboratory of Theoretical Chemistry of Environment, Ministry of Education, Guangzhou 510640, China;

[b] School of Chemistry and Chemical Engineering, South China University of Technology, Guangzhou 510640, China;

[c] School of Environmental and Chemical Engineering, Jiangsu University of Science and Technology, Zhenjiang, 212003, P. R. China.

*E-mail:* [wangzy@scnu.edu.cn](mailto:wangzy@scnu.edu.cn); *Fax:* (+86) 20-39310187; *Tel.:* (+86) 20-39310258

## Table of Contents

|                                                                                                                |     |
|----------------------------------------------------------------------------------------------------------------|-----|
| General Information.....                                                                                       | [2] |
| Experimental Procedure for Compounds <b>3</b> .....                                                            | [2] |
| Characterization Data for All Products <b>3</b> .....                                                          | [2] |
| References.....                                                                                                | [6] |
| <b>Figure S1.</b> MS spectrum of intermediate <b>I</b> in <b>Schemes 3</b> and <b>4</b> detected by GC-MS..... | [7] |
| <b>Scheme S1.</b> The reported synthetic methods of arylsulfonyl dibromomethanes.....                          | [7] |
| NMR Spectra for All Compounds <b>3</b> .....                                                                   | [8] |

## General Information

$^1\text{H}$  and  $^{13}\text{C}$  NMR spectra were recorded on BRUKER DRX-400 spectrometer using  $\text{CDCl}_3$  as solvent and TMS as an internal standard. Gas chromatograph mass spectra (GC-MS) were performed on a SHIMADZU model GCMS-QP5000 spectrometer. High-resolution mass spectra (ESI) were tested on a LCMS-IT-TOF mass spectrometer. Unless otherwise stated, all reagents and solvents were purchased from commercial suppliers and used without further purification. 3,4-Dibromo-5-hydroxy-2(5*H*)-furanone was synthesized according to the literature procedure.<sup>1</sup>

## Experimental Procedure for Compounds 3

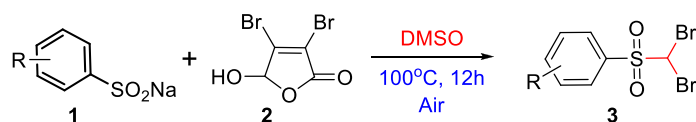

The mixture of sodium arylsulfonates **1** (0.55 mmol) and 3,4-dibromo-2(5*H*)-furanone **2** (0.50 mmol) in DMSO (3 mL) was stirred at 100 °C under air for 12 h. At room temperature, the reaction mixture was diluted with H<sub>2</sub>O (15 mL) and extracted with EtOAc (3 × 15 mL). The combined organic extracts were dried over MgSO<sub>4</sub>. After filtration and evaporation of the solvents under reduced pressure, the crude product was purified by column chromatography on silica gel to afford desired product.

## Characterization Data for All Products 3

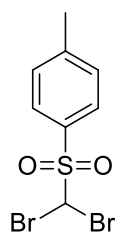

### 1-(Dibromomethylsulfonyl)-4-methylbenzene (3a)

Yellow liquid (138 mg, 84%).  $^1\text{H}$  NMR ( $\text{CDCl}_3$ , 400 MHz):  $\delta$  7.93 (d,  $J$  = 8.0 Hz, 2H), 7.42 (d,  $J$  = 8.0 Hz, 2H), 6.23 (s, 1H), 2.50 (s, 3H).  $^{13}\text{C}$  NMR (100 MHz,  $\text{CDCl}_3$ ):  $\delta$  146.9, 131.2, 129.9, 129.1, 50.8, 21.9. IR (film),  $\nu$ ,  $\text{cm}^{-1}$ : 3040, 2974, 1592, 1495, 1331, 1150, 814, 643, 544. ESI-MS,  $m/z$  (%): Calcd for  $\text{C}_8\text{H}_7\text{Br}_2\text{O}_2\text{S}^-$  ( $[\text{M}-\text{H}]^-$ ): 326.85 (100.0), Found: 326.96 (30.0). Anal. Calcd for  $\text{C}_8\text{H}_8\text{Br}_2\text{O}_2\text{S}$ : C 29.29, H 2.46, O 9.76, Found: C 29.17, H 2.56, O 9.67.

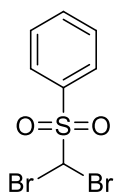

**(Dibromomethylsulfonyl)benzene (3b)**

Yellow liquid (129 mg, 82%).  $^1\text{H NMR}$  ( $\text{CDCl}_3$ , 400 MHz):  $\delta$  7.99 (d,  $J = 8.0$  Hz, 2H), 7.70 (t,  $J = 8.0$  Hz, 1H), 7.59-7.53 (m, 2H), 6.18 (s, 1H).  $^{13}\text{C NMR}$  (100 MHz,  $\text{CDCl}_3$ ):  $\delta$  135.4, 132.2, 131.2, 129.2, 50.5. IR (film),  $\nu$ ,  $\text{cm}^{-1}$ : 3066, 2917, 2854, 1581, 1504, 1450, 1342, 1163, 824, 684, 556. ESI-MS,  $m/z$  (%): Calcd for  $\text{C}_7\text{H}_5\text{Br}_2\text{O}_2\text{S}^-$  ( $[\text{M}-\text{H}]^-$ ): 312.84 (100.0), Found: 313.09 (52.7). Anal. Calcd for  $\text{C}_7\text{H}_6\text{Br}_2\text{O}_2\text{S}$ : C 26.78, H 1.93, O 10.19, Found: C 26.87, H 1.86, O 10.26.

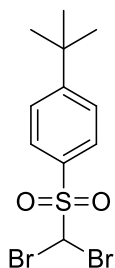

**1-Tert-butyl-4-(dibromomethylsulfonyl)benzene (3c)**

Yellow solid (148 mg, 79%). m.p. 72.9-74.5 °C.  $^1\text{H NMR}$  ( $\text{CDCl}_3$ , 400 MHz):  $\delta$  7.97 (d,  $J = 8.0$  Hz, 2H), 7.62 (d,  $J = 8.0$  Hz, 2H), 6.23 (s, 1H), 1.37 (s, 9H).  $^{13}\text{C NMR}$  (100 MHz,  $\text{CDCl}_3$ ):  $\delta$  159.72, 131.1, 129.0, 126.3, 50.8, 35.51, 31.0. IR (film),  $\nu$ ,  $\text{cm}^{-1}$ : 3063, 2961, 2866, 1597, 1503, 1338, 1161, 832, 608, 514. ESI-MS,  $m/z$  (%): Calcd for  $\text{C}_{11}\text{H}_{13}\text{Br}_2\text{O}_2\text{S}^-$  ( $[\text{M}-\text{H}]^-$ ): 368.90 (100.0), Found: 368.83 (68.3). Anal. Calcd for  $\text{C}_{11}\text{H}_{14}\text{Br}_2\text{O}_2\text{S}$ : C 35.70, H 3.81, O 8.65, Found: C 35.78, H 3.93, O 8.79.

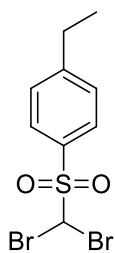

**1-(Dibromomethylsulfonyl)-4-ethylbenzene (3d)**

Yellow liquid (138 mg, 72%).  $^1\text{H NMR}$  ( $\text{CDCl}_3$ , 400 MHz):  $\delta$  7.98 (d,  $J = 8.0$  Hz, 2H), 7.46 (d,  $J = 8.0$  Hz, 2H), 6.26 (s, 1H), 2.84-2.78 (q,  $J = 8.0$  Hz, 2H), 1.32 (t,  $J = 8.0$  Hz, 3H).  $^{13}\text{C NMR}$  (100 MHz,  $\text{CDCl}_3$ ):  $\delta$  152.9, 131.3, 129.2, 128.7, 50.8, 29.0, 14.9. IR (film),  $\nu$ ,  $\text{cm}^{-1}$ : 3052, 2958, 2870, 1600, 1502, 1451, 1331, 1155, 825, 648, 547. ESI-MS,  $m/z$  (%): Calcd for  $\text{C}_9\text{H}_9\text{Br}_2\text{O}_2\text{S}^-$  ( $[\text{M}-\text{H}]^-$ ): 340.87 (100.0), Found: 340.86 (45.3). Anal. Calcd for  $\text{C}_9\text{H}_{10}\text{Br}_2\text{O}_2\text{S}$ : C 31.60, H 2.95, O 3.96, Found: C 31.78, H 2.83, O 3.89.

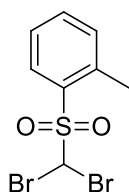

### 1-(Dibromomethylsulfonyl)-2-methylbenzene (3e)

Yellow liquid (128 mg, 78%).  $^1\text{H NMR}$  ( $\text{CDCl}_3$ , 400 MHz):  $\delta$  7.87-7.83 (m, 2H), 7.57-7.48 (m, 2H), 6.24 (s, 1H), 2.47 (s, 3H).  $^{13}\text{C NMR}$  (100 MHz,  $\text{CDCl}_3$ ):  $\delta$  139.7, 136.2, 132.0, 131.2, 129.1, 128.3, 50.7, 21.4. IR (film),  $\nu$ ,  $\text{cm}^{-1}$ : 3065, 2921, 2849, 1600, 1503, 1477, 1451, 1330, 1155, 855, 682, 572. ESI-MS,  $m/z$  (%): Calcd for  $\text{C}_8\text{H}_8\text{Br}_2\text{O}_2\text{S}^-$  ( $[\text{M}-\text{H}]^-$ ): 326.85 (100.0), Found: 327.07 (77.2). Anal. Calcd for  $\text{C}_8\text{H}_8\text{Br}_2\text{O}_2\text{S}$ : C 29.29, H 2.46, O 9.76, Found: C 29.18, H 2.53, O 9.89.

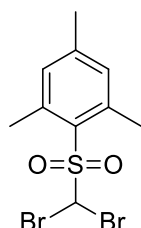

### 2-(Dibromomethylsulfonyl)-1,3,5-trimethylbenzene (3f)

Yellow solid (132 mg, 74%). m.p. 115.6-117.6 °C.  $^1\text{H NMR}$  ( $\text{CDCl}_3$ , 400 MHz):  $\delta$  7.05 (s, 2H), 6.37 (s, 1H), 2.73 (s, 6H), 2.37 (s, 3H).  $^{13}\text{C NMR}$  (100 MHz,  $\text{CDCl}_3$ ):  $\delta$  144.1, 141.0, 131.6, 51.3 (C-1), 22.3, 20.1. IR (film),  $\nu$ ,  $\text{cm}^{-1}$ : 3034, 2920, 2848, 1600, 1502, 1455, 1331, 1155, 803, 642, 516. ESI-MS,  $m/z$  (%): Calcd for  $\text{C}_{10}\text{H}_{11}\text{Br}_2\text{O}_2\text{S}^-$  ( $[\text{M}-\text{H}]^-$ ): 354.88 (100.0), Found: 355.24 (40.3). Anal. Calcd for  $\text{C}_{10}\text{H}_{12}\text{Br}_2\text{O}_2\text{S}$ : C 33.73, H 3.40, O 8.99, Found: C 33.68, H 3.53, O 8.89.

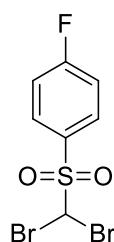

### 1-(Dibromomethylsulfonyl)-4-chlorobenzene (3h)

Yellow liquid (130 mg, 78%).  $^1\text{H NMR}$  ( $\text{CDCl}_3$ , 400 MHz):  $\delta$  8.11-8.08 (m, 2H), 7.33-7.29 (m, 2H), 6.27 (s, 1H).  $^{13}\text{C NMR}$  (100 MHz,  $\text{CDCl}_3$ ):  $\delta$  166.0 (d,  $J = 258.0$  Hz), 133.3 (d,  $J = 10.0$  Hz), 127.0 (d,  $J = 3.0$  Hz), 115.7 (d,  $J = 23.0$  Hz), 49.4. IR (film),  $\nu$ ,  $\text{cm}^{-1}$ : 3102, 2920, 2853, 1583, 1493, 1455, 1339, 1244, 1155, 834, 622, 548. ESI-MS,  $m/z$  (%): Calcd for  $\text{C}_7\text{H}_4\text{Br}_2\text{FO}_2\text{S}^-$  ( $[\text{M}-\text{H}]^-$ ): 330.83 (100.0), Found: 331.26 (100.0). Anal. Calcd for  $\text{C}_7\text{H}_5\text{Br}_2\text{FO}_2\text{S}$ : C 25.32, H 1.52, O 9.64, Found: C 25.48, H 1.43, O 9.79.

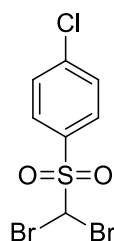

### 1-Chloro-4-(dibromomethylsulfonyl)benzene (3h)

Yellow solid (133 mg, 76%). m.p. 127.8-129.2 °C.  $^1\text{H NMR}$  ( $\text{CDCl}_3$ , 400 MHz):  $\delta$  7.93 (d,  $J = 8.0$  Hz, 2H), 7.54 (d,  $J = 8.0$  Hz, 2H), 6.19 (s, 1H).  $^{13}\text{C NMR}$  (100 MHz,  $\text{CDCl}_3$ ):  $\delta$  142.6, 132.6, 130.5, 129.6, 50.2. IR (film),  $\nu$ ,  $\text{cm}^{-1}$ : 3091, 2959, 2858, 1579, 1507, 1457, 1339, 1187, 826, 710, 649, 556. ESI-MS,  $m/z$  (%): Calcd for  $\text{C}_7\text{H}_4\text{Br}_2\text{ClO}_2\text{S}^-$  ( $[\text{M}-\text{H}]^-$ ): 346.80 (100.0), Found: 346.98 (100.0). Anal. Calcd for  $\text{C}_7\text{H}_5\text{Br}_2\text{ClO}_2\text{S}$ :

C 24.13, H 1.45, O 9.18, Found: C 24.28, H 1.33, O 9.29.

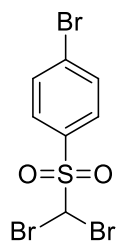

**1-Bromo-4-(dibromomethylsulfonyl)benzene (3i)**

White solid (142 mg, 72%). m.p. 130.1-131.3 °C. <sup>1</sup>H NMR (CDCl<sub>3</sub>, 400 MHz): δ 7.91 (d, *J* = 8.0 Hz, 2H), 7.77 (d, *J* = 8.0 Hz, 2H), 6.25 (s, 1H). <sup>13</sup>C NMR (100 MHz, CDCl<sub>3</sub>): δ 132.62, 132.61, 131.3, 131.0, 50.2. IR (film), ν, cm<sup>-1</sup>: 3095, 2916, 2849, 1574, 1502, 1451, 1339, 1155, 826, 635, 579. ESI-MS, m/z (%): Calcd for C<sub>7</sub>H<sub>4</sub>Br<sub>3</sub>O<sub>2</sub>S<sup>-</sup> ([M-H]<sup>-</sup>): 392.74 (100.0), Found: 393.15 (98.7). Anal. Calcd for C<sub>7</sub>H<sub>5</sub>Br<sub>3</sub>O<sub>2</sub>S: C 21.40, H 1.28, O 8.14, Found: C 21.48, H 1.43, O 8.29.

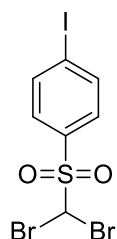

**1-(Dibromomethylsulfonyl)-4-iodobenzene (3j)**

Yellow solid (152 mg, 69%). m.p. 124.8-126.3 °C. <sup>1</sup>H NMR (CDCl<sub>3</sub>, 400 MHz): δ 8.00 (d, *J* = 8.0 Hz, 2H), 7.75 (d, *J* = 8.0 Hz, 2H), 6.23 (s, 1H). <sup>13</sup>C NMR (100 MHz, CDCl<sub>3</sub>): δ 138.6, 132.3, 131.8, 104.3, 50.1. IR (film), ν, cm<sup>-1</sup>: 3086, 2920, 2844, 1571, 1455, 1339, 1155, 821, 636, 579, 527. ESI-MS, m/z (%): Calcd for C<sub>7</sub>H<sub>4</sub>Br<sub>2</sub>IO<sub>2</sub>S<sup>-</sup> ([M-H]<sup>-</sup>): 438.73 (100.0), Found: 439.11 (67.7). Anal. Calcd for C<sub>7</sub>H<sub>5</sub>Br<sub>2</sub>IO<sub>2</sub>S: C 19.11, H 1.15, O 7.29, Found: C 19.28, H 1.23, O 7.17.

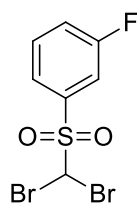

**1-(Dibromomethylsulfonyl)-3-fluorobenzene (3k)**

Yellow liquid (118 mg, 71%). <sup>1</sup>H NMR (CDCl<sub>3</sub>, 400 MHz): δ 7.86 (d, *J* = 8.0 Hz, 1H), 7.77 (d, *J* = 8.0 Hz, 1H), 7.66-7.60 (m, 1H), 7.50-7.46 (m, 1H), 6.26 (s, 1H). <sup>13</sup>C NMR (100 MHz, CDCl<sub>3</sub>): δ 162.2 (d, *J* = 252.0 Hz), 134.1 (d, *J* = 7.0 Hz), 131.0 (d, *J* = 8.0 Hz), 127.1 (d, *J* = 4.0 Hz), 122.8 (d, *J* = 21.0 Hz), 118.5 (d, *J* = 24.0 Hz), 50.0. IR (film), ν, cm<sup>-1</sup>: 3077, 2985, 2853, 1601, 1498, 1440, 1339, 1224, 1154, 801, 673, 547. ESI-MS, m/z (%): Calcd for C<sub>7</sub>H<sub>5</sub>Br<sub>2</sub>FO<sub>2</sub>S<sup>-</sup> ([M-H]<sup>-</sup>): 330.83 (100.0), Found: 331.09 (100.0). Anal. Calcd for C<sub>7</sub>H<sub>5</sub>Br<sub>2</sub>FO<sub>2</sub>S: C 25.32, H 1.52, O 9.64, Found: C 25.38, H 1.34, O 9.79.

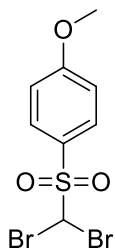

### 1-(Dibromomethylsulfonyl)-4-methoxybenzene (3l)

Gray solid (154 mg, 90%). m.p. 90.0-91.3 °C. <sup>1</sup>H NMR (CDCl<sub>3</sub>, 400 MHz): δ 7.90 (d, *J* = 8.0 Hz, 2H), 7.00 (d, *J* = 8.0 Hz, 2H), 6.16 (s, 1H), 3.85 (s, 3H). <sup>13</sup>C NMR (100 MHz, CDCl<sub>3</sub>): δ 165.2, 133.5, 123.0, 114.5, 55.9, 51.1. IR (film), ν, cm<sup>-1</sup>: 3086, 2980, 2840, 1587, 1498, 1457, 1339, 1264, 1155, 821, 651, 555. ESI-MS, *m/z* (%): Calcd for C<sub>8</sub>H<sub>7</sub>Br<sub>2</sub>O<sub>3</sub>S<sup>-</sup> ([M-H]<sup>-</sup>): 342.85 (100.0), Found: 343.05 (30.7). Anal. Calcd for C<sub>8</sub>H<sub>8</sub>Br<sub>2</sub>O<sub>3</sub>S: C 27.93, H 2.34, O 13.95, Found: C 27.98, H 2.45, O 13.89.

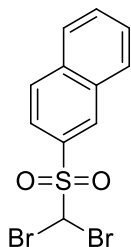

### 2-(Dibromomethylsulfonyl)naphthalene (3m)

Yellow solid (153 mg, 84%). m.p. 126.9-128.7 °C. <sup>1</sup>H NMR (CDCl<sub>3</sub>, 400 MHz): δ 8.65 (s, 1H), 8.05-7.96 (m, 4H), 7.76-7.66 (m, 2H), 6.33 (s, 1H). <sup>13</sup>C NMR (100 MHz, CDCl<sub>3</sub>): δ 136.1, 133.8, 131.9, 130.3, 129.7, 129.4, 129.1, 128.1, 128.0, 124.8, 50.8. IR (film), ν, cm<sup>-1</sup>: 3053, 2981, 1592, 1507, 1453, 1331, 1155, 813, 753, 653, 549. ESI-MS, *m/z* (%): Calcd for C<sub>11</sub>H<sub>7</sub>Br<sub>2</sub>O<sub>3</sub>S<sup>-</sup> ([M-H]<sup>-</sup>): 362.85 (100.0), Found: 362.59 (65.7). Anal. Calcd for C<sub>11</sub>H<sub>8</sub>Br<sub>2</sub>O<sub>2</sub>S: C 36.29, H 2.21, O 8.79, Found: C 36.18, H 2.33, O 8.89.

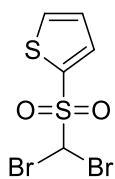

### 2-(Dibromomethylsulfonyl)thiophene (3n)

Gray solid (168 mg, 77%). m.p. 120.9-122.8 °C. <sup>1</sup>H NMR (CDCl<sub>3</sub>, 400 MHz): δ 7.88-7.83 (m, 2H), 7.21-7.18 (m, 1H), 6.27 (s, 1H). <sup>13</sup>C NMR (100 MHz, CDCl<sub>3</sub>): δ 139.0, 137.4, 131.4, 128.2, 51.0. IR (film), ν, cm<sup>-1</sup>: 3095, 2923, 1503, 1457, 1339, 1155, 744, 627, 577. ESI-MS, *m/z* (%): Calcd for C<sub>5</sub>H<sub>3</sub>Br<sub>2</sub>O<sub>2</sub>S<sub>2</sub><sup>-</sup> ([M-H]<sup>-</sup>): 318.79 (100.0), Found: 319.36 (64.7). Anal. Calcd for C<sub>5</sub>H<sub>4</sub>Br<sub>2</sub>O<sub>2</sub>S<sub>2</sub>: C 18.77, H 1.26, O 10.00, Found: C 18.88, H 1.37, O 10.26.

## References

- (a) Y.-H. Tan, J.-X. Li, F.-L. Xue, J. Qi, Z.-Y. Wang, *Tetrahedron* **2012**, *68*, 2827. (b) F.-L. Xue, J.-X.

Li, Z.-Y. Wang, J.-F. Xiong. *Res. Chem. Intermed.* **2013**, *39*, 1153. (c) J.-P. Huo, P. Peng, G.-H. Deng, W. Wu, J.-F. Xiong, M.-L. Zhong, Z.-Y. Wang, *Macromol. Rapid Commun.* **2013**, *34*, 1779. (d) J.-P. Huo, J.-C. Luo, W. Wu, J.-F. Xiong, G.-Z. Mo, Z.-Y. Wang, *Ind. Eng. Chem. Res.* **2013**, *52*, 11850.

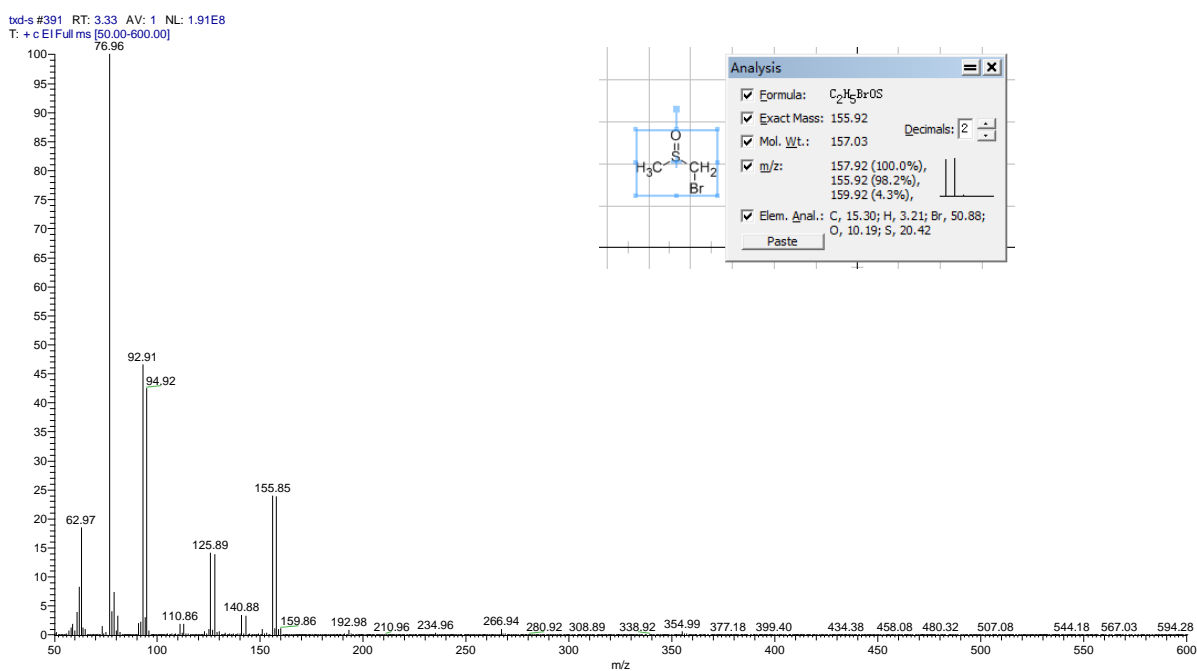

**Figure S1.** MS spectrum of intermediate **I** in Schemes 3 and 4 detected by GC-MS

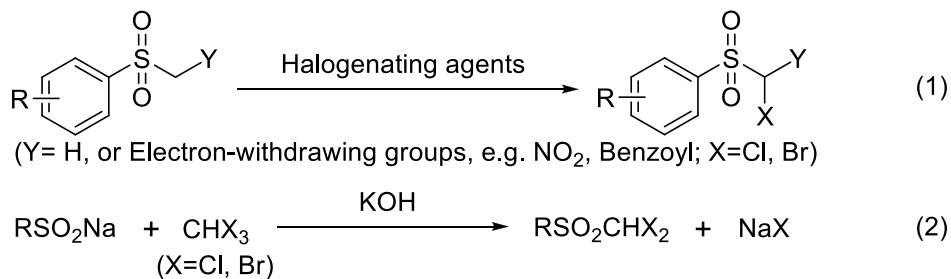

**Scheme S1.** The reported synthetic methods of arylsulfonyl dibromomethanes

### NMR Spectra for All Compounds 3

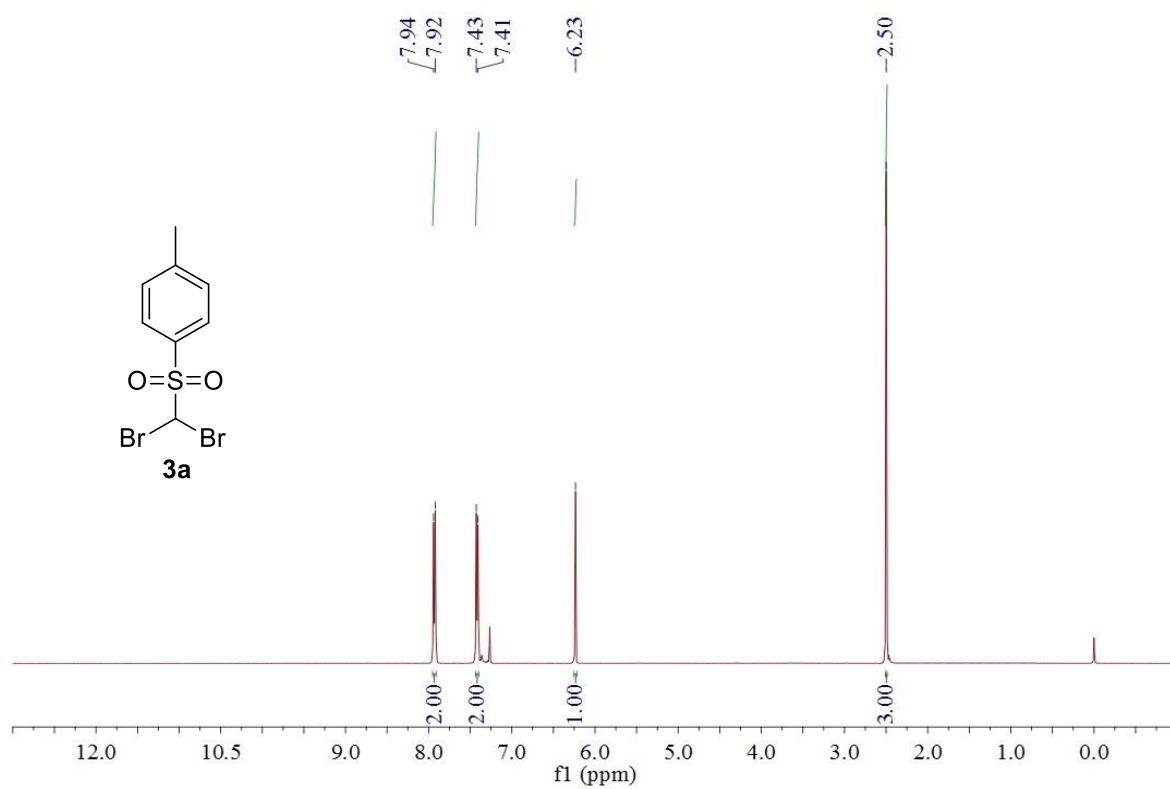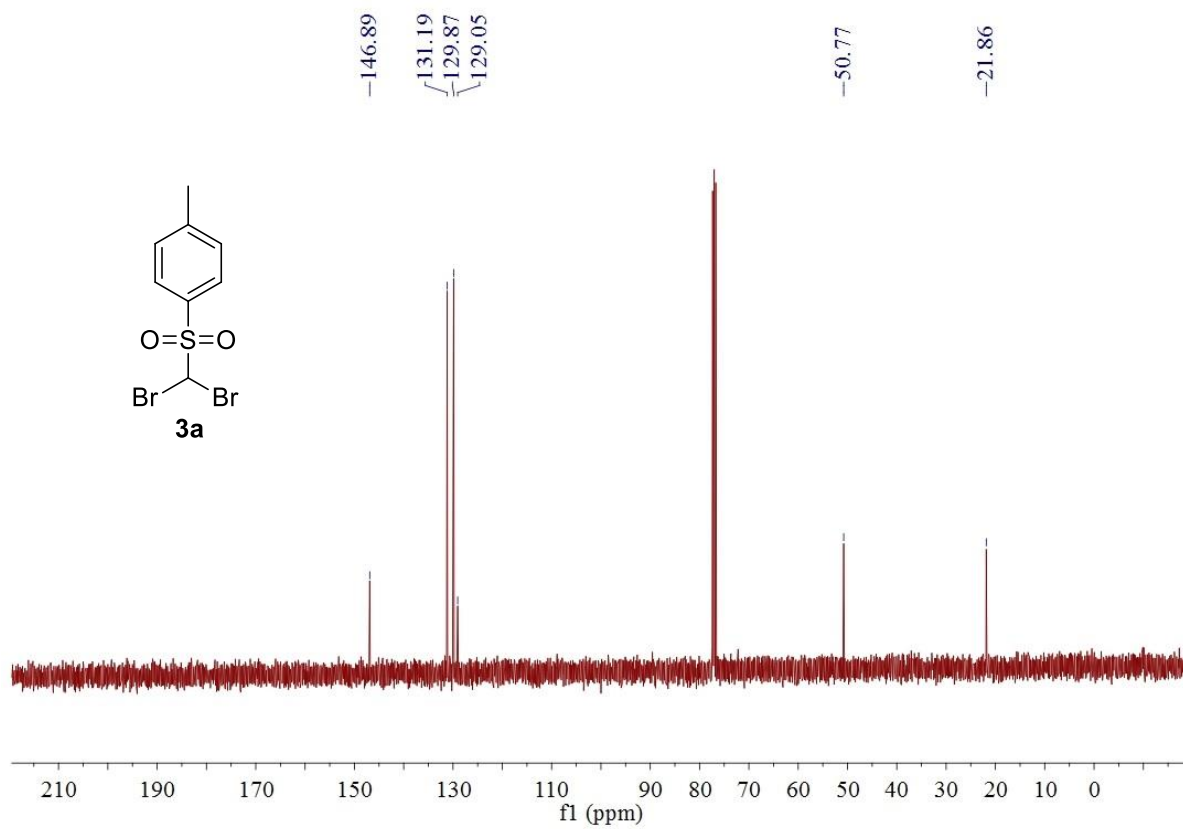



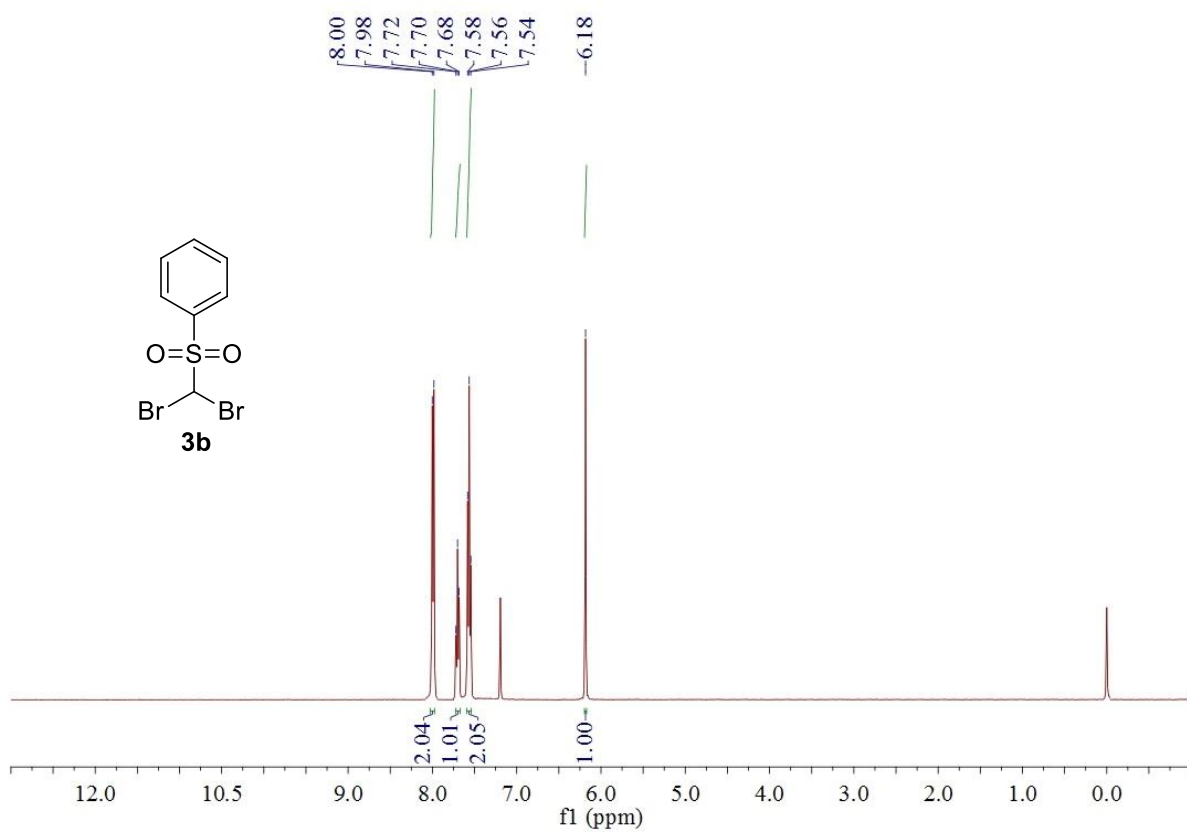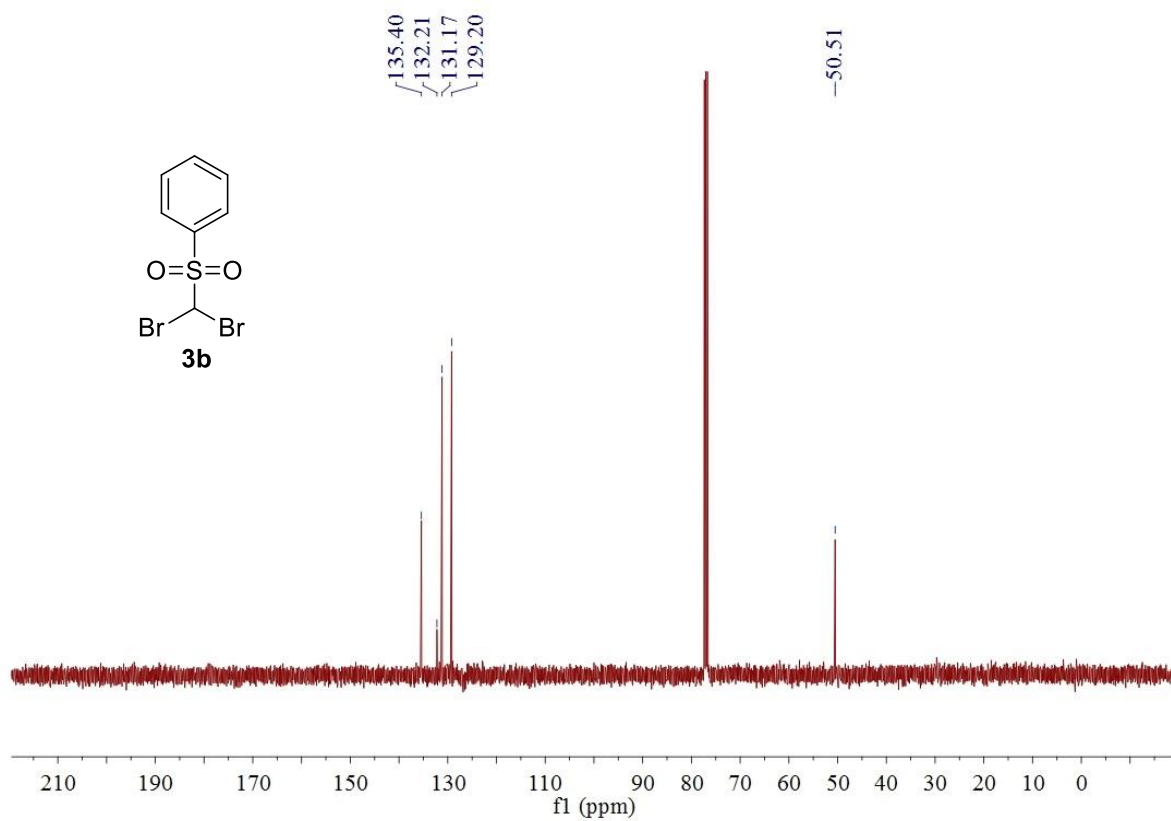

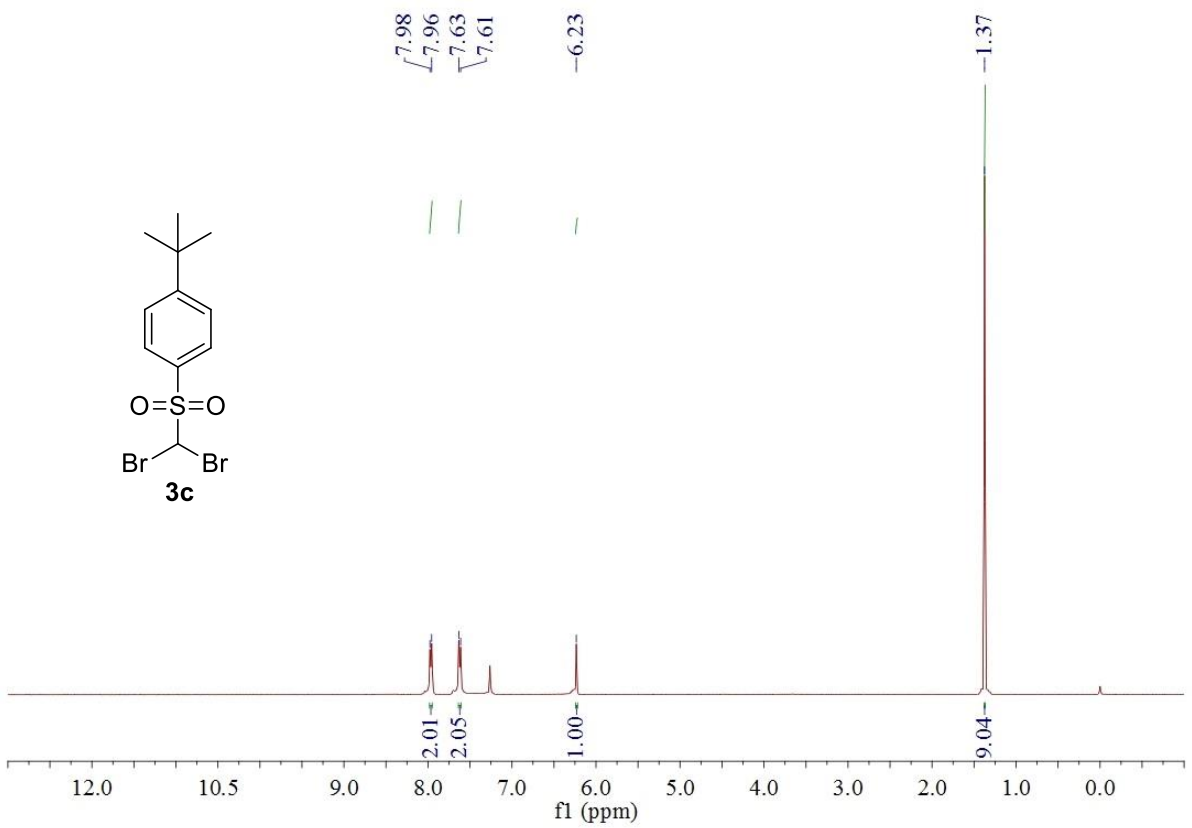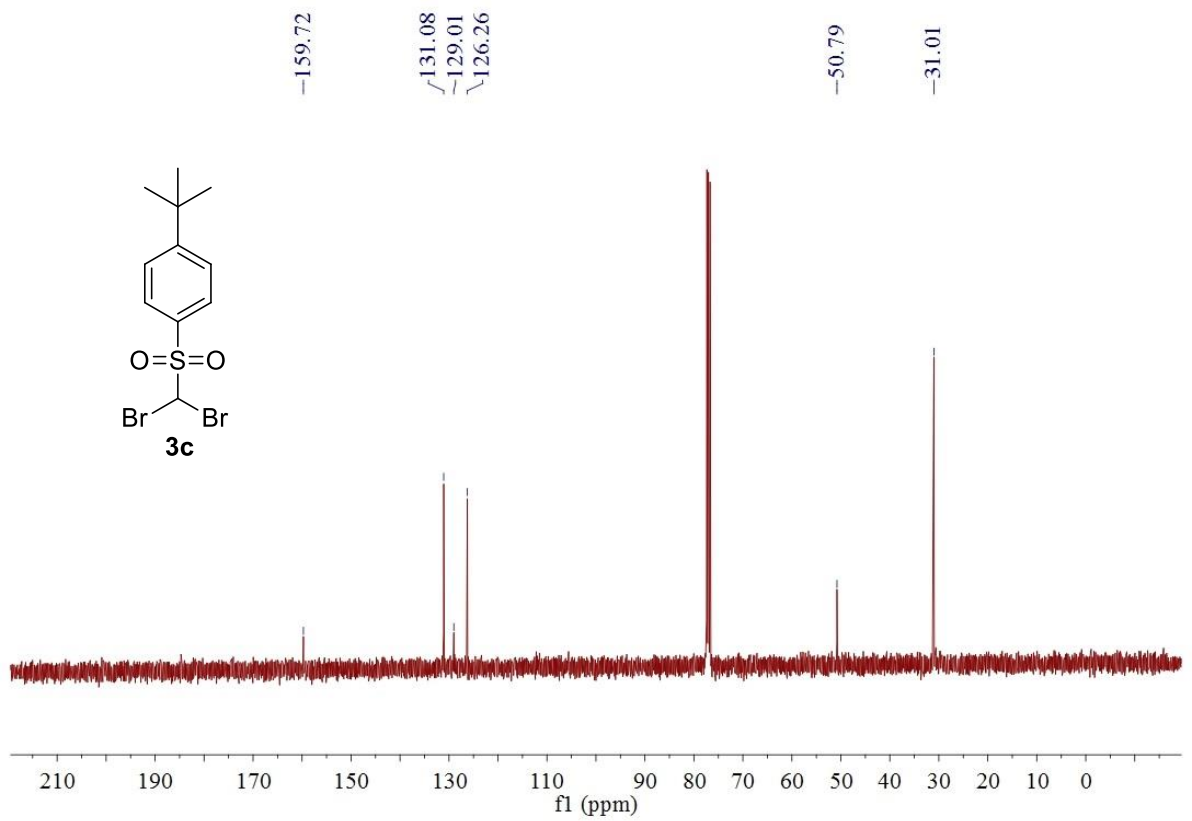

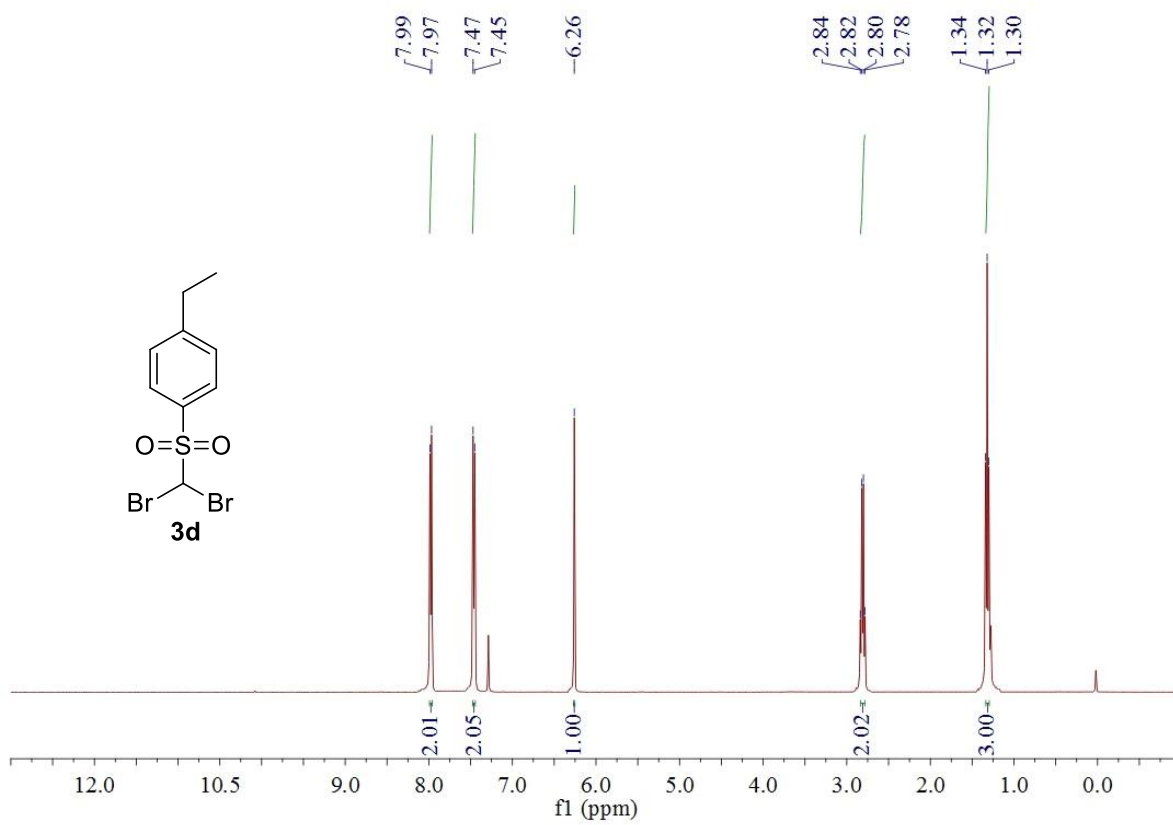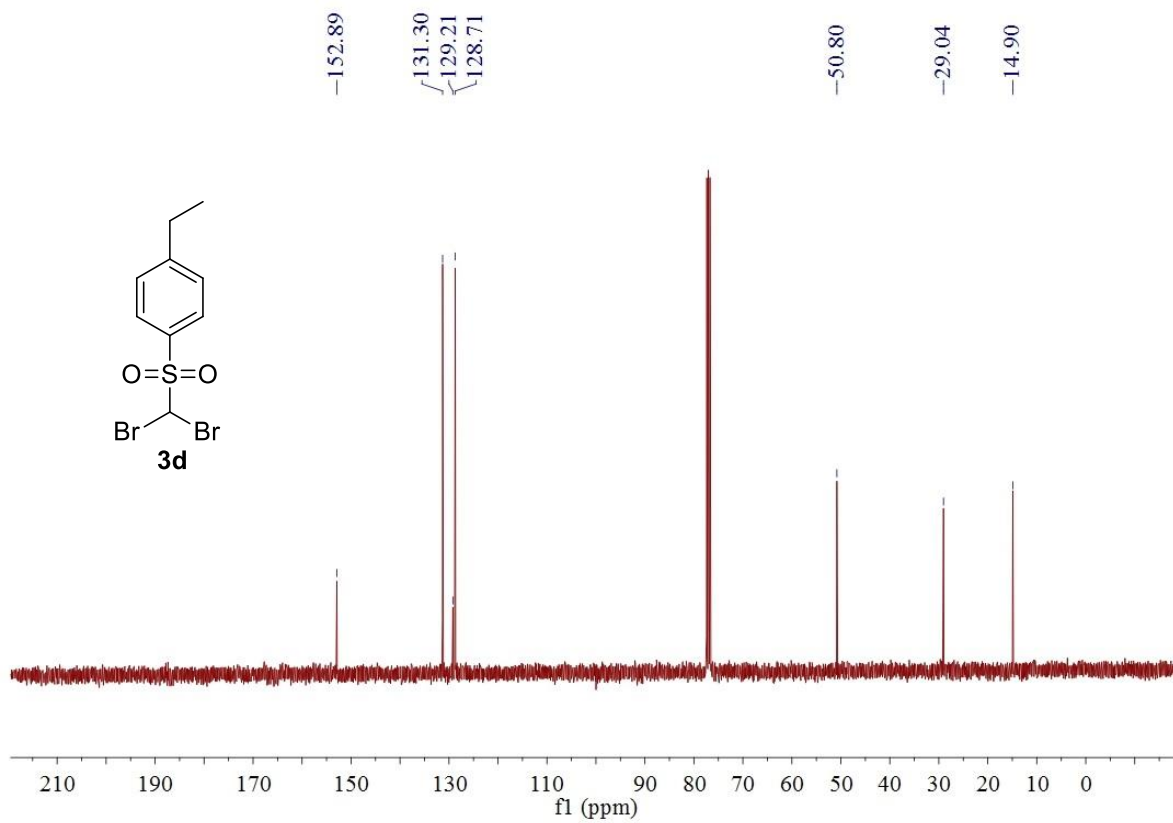

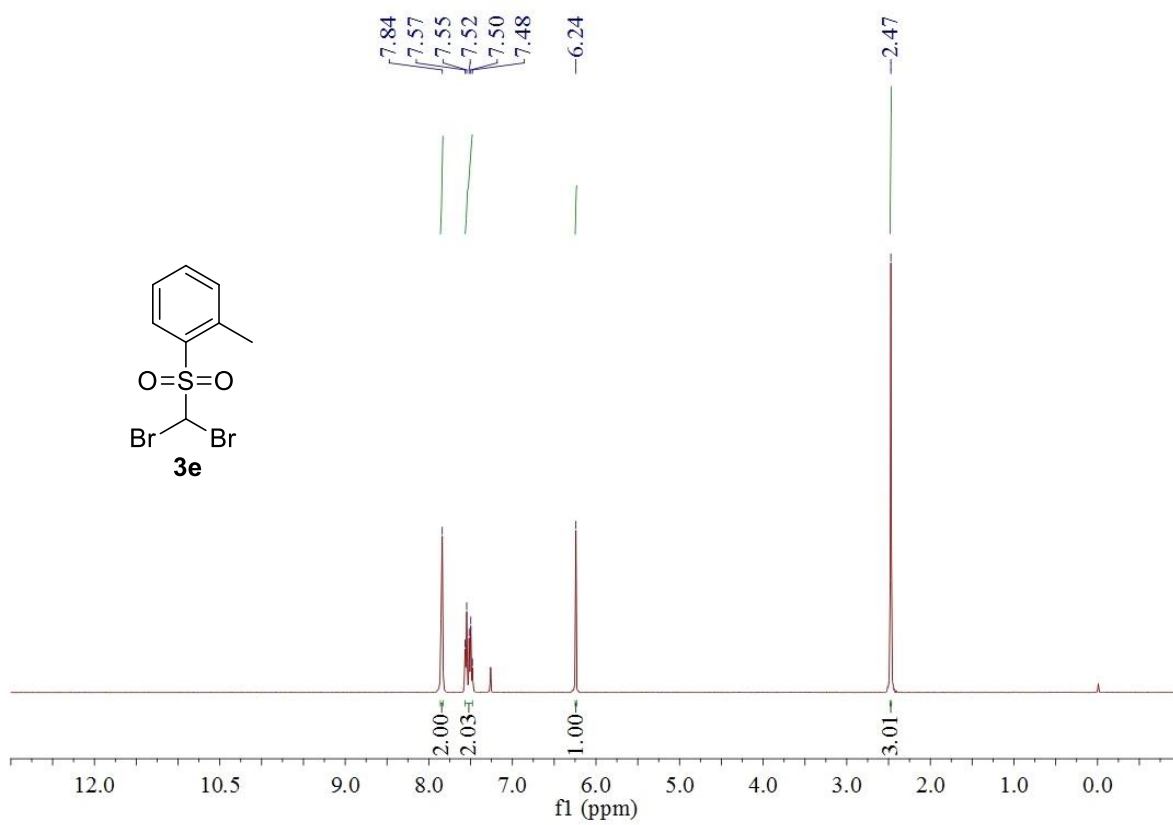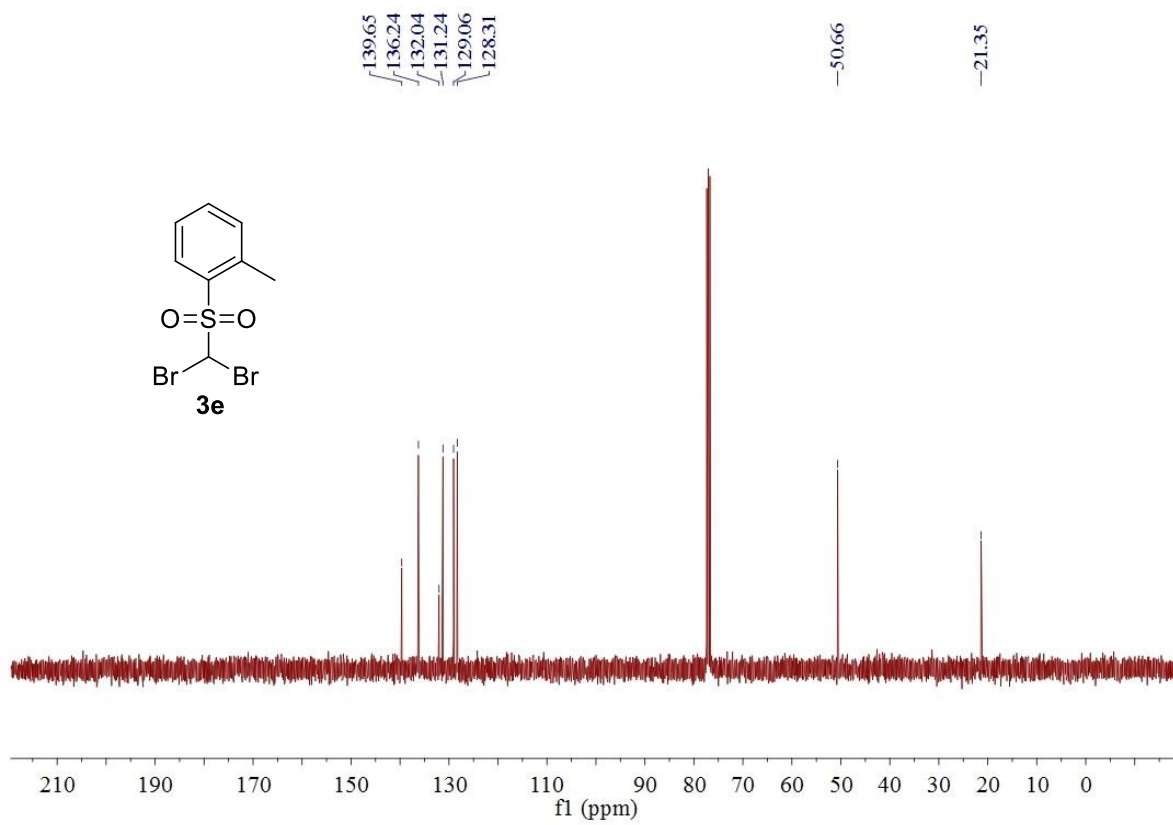

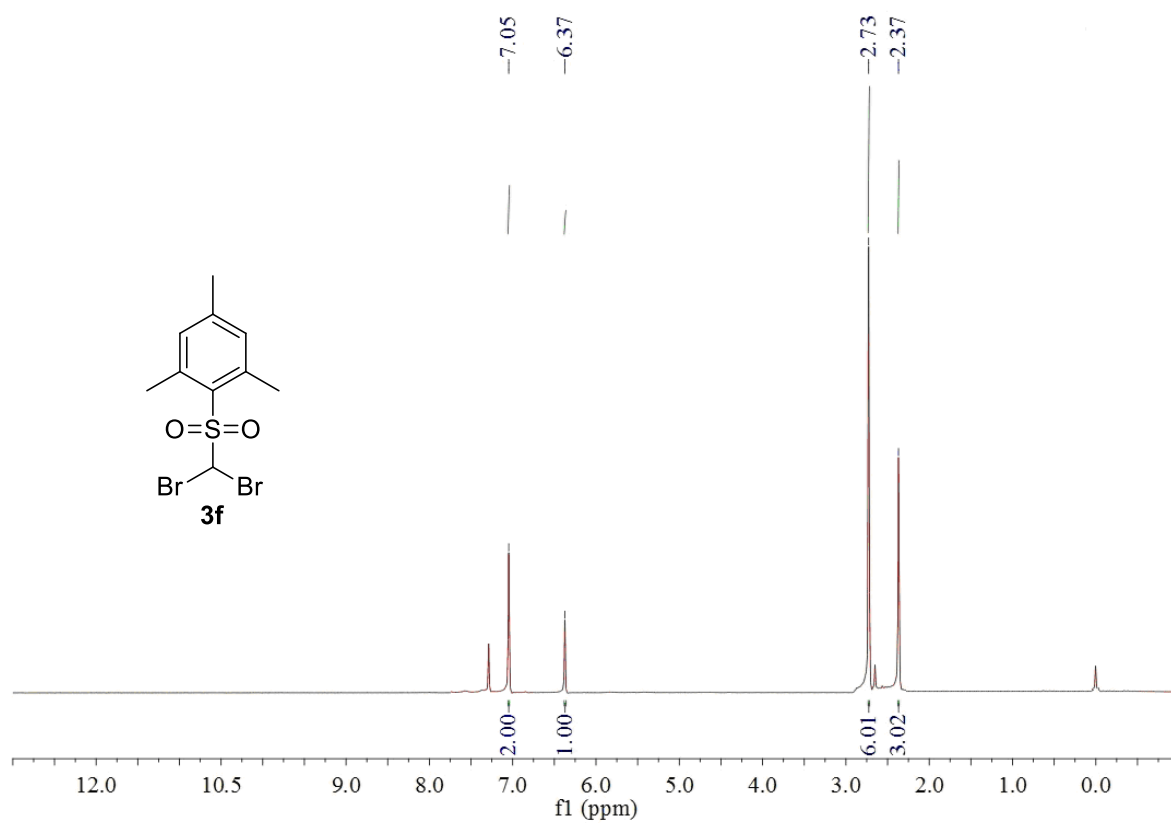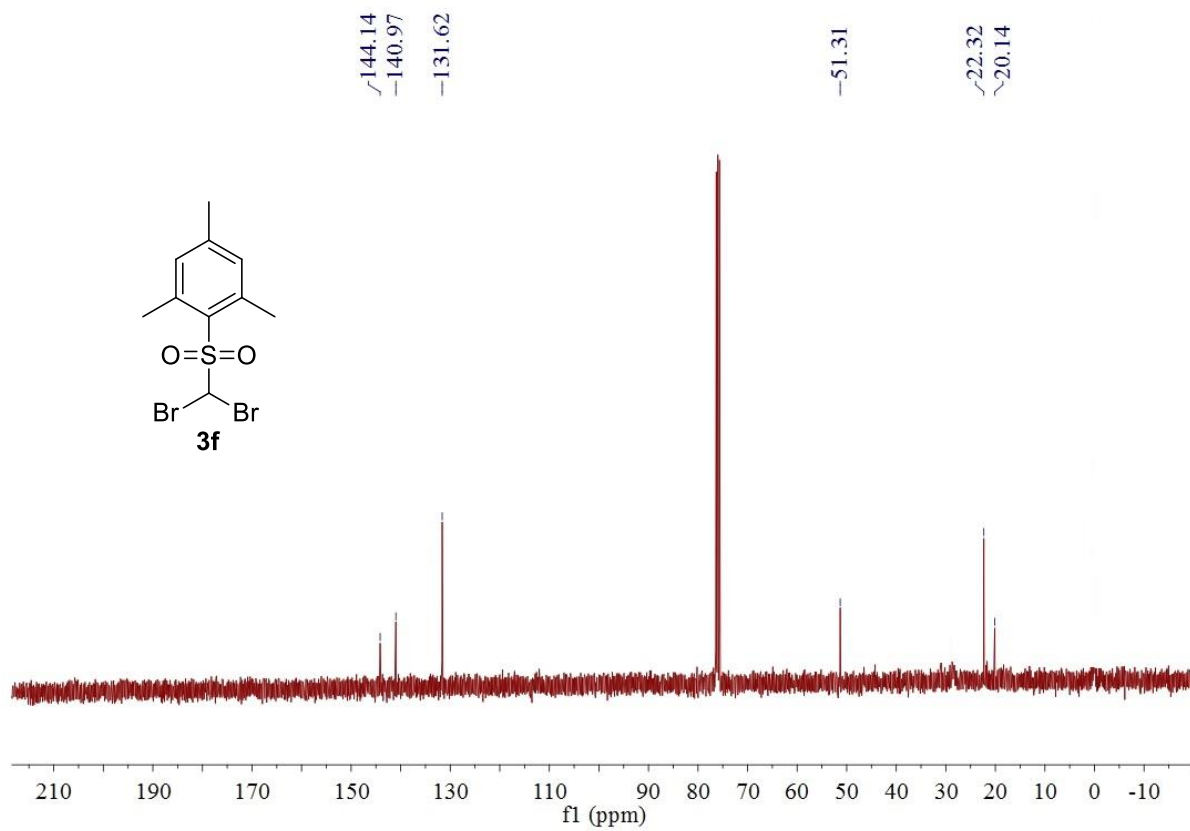

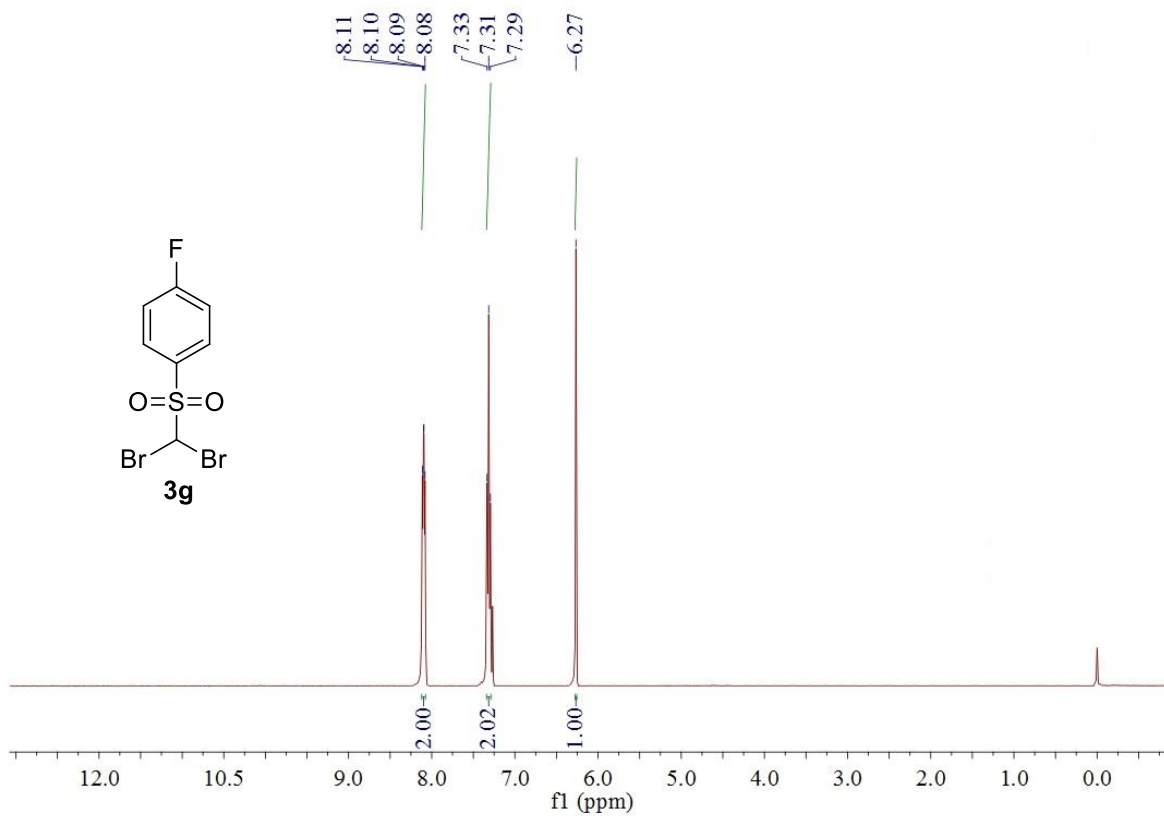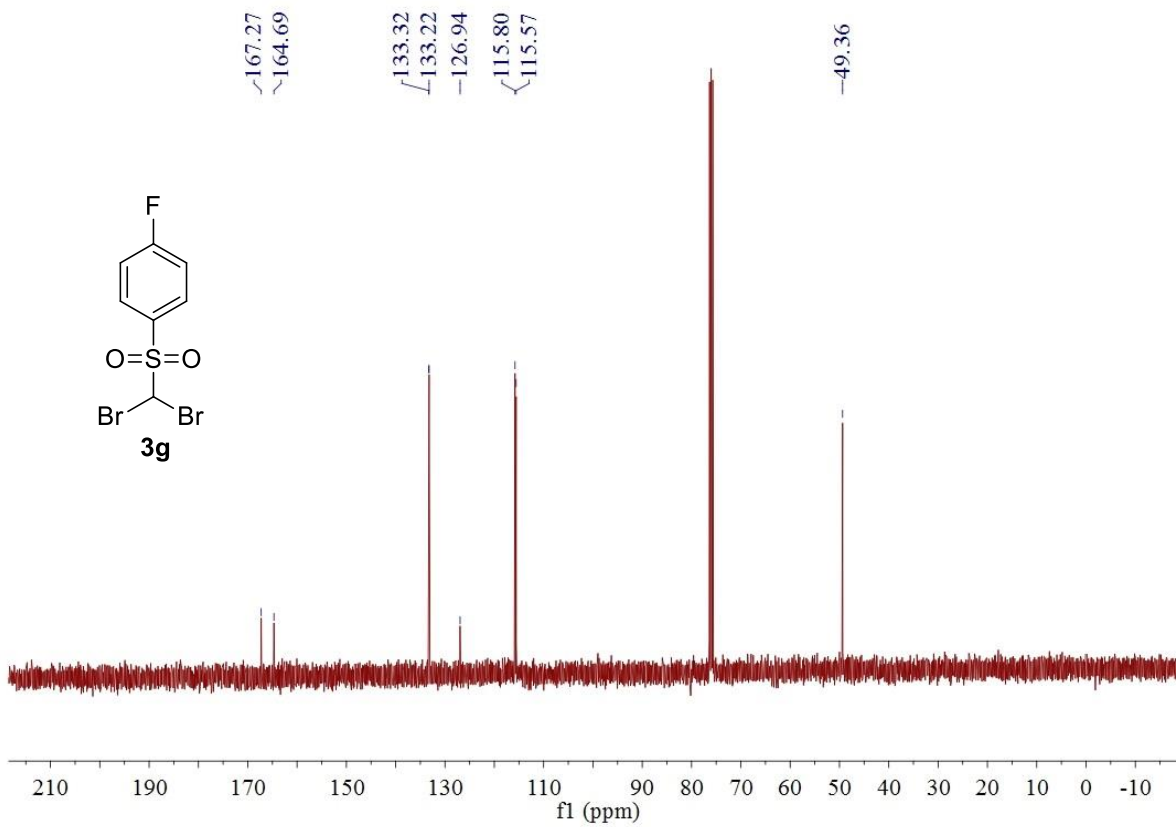

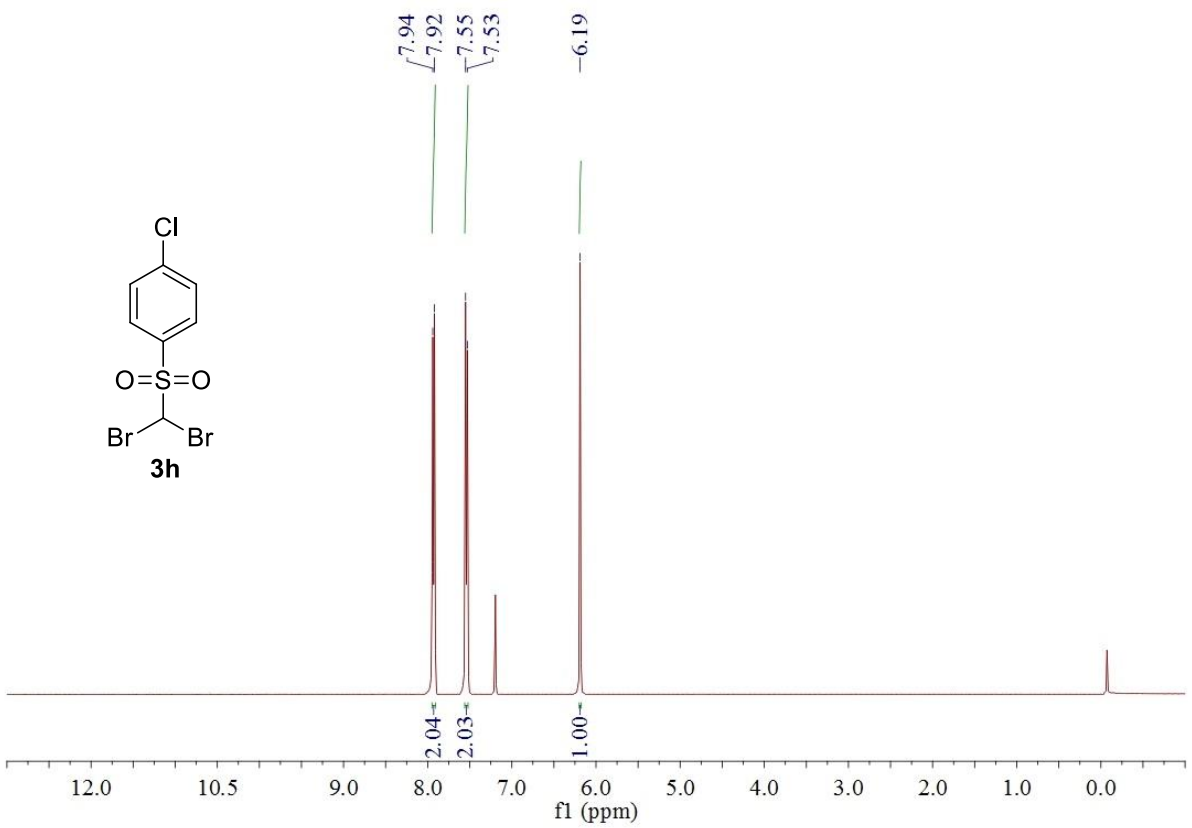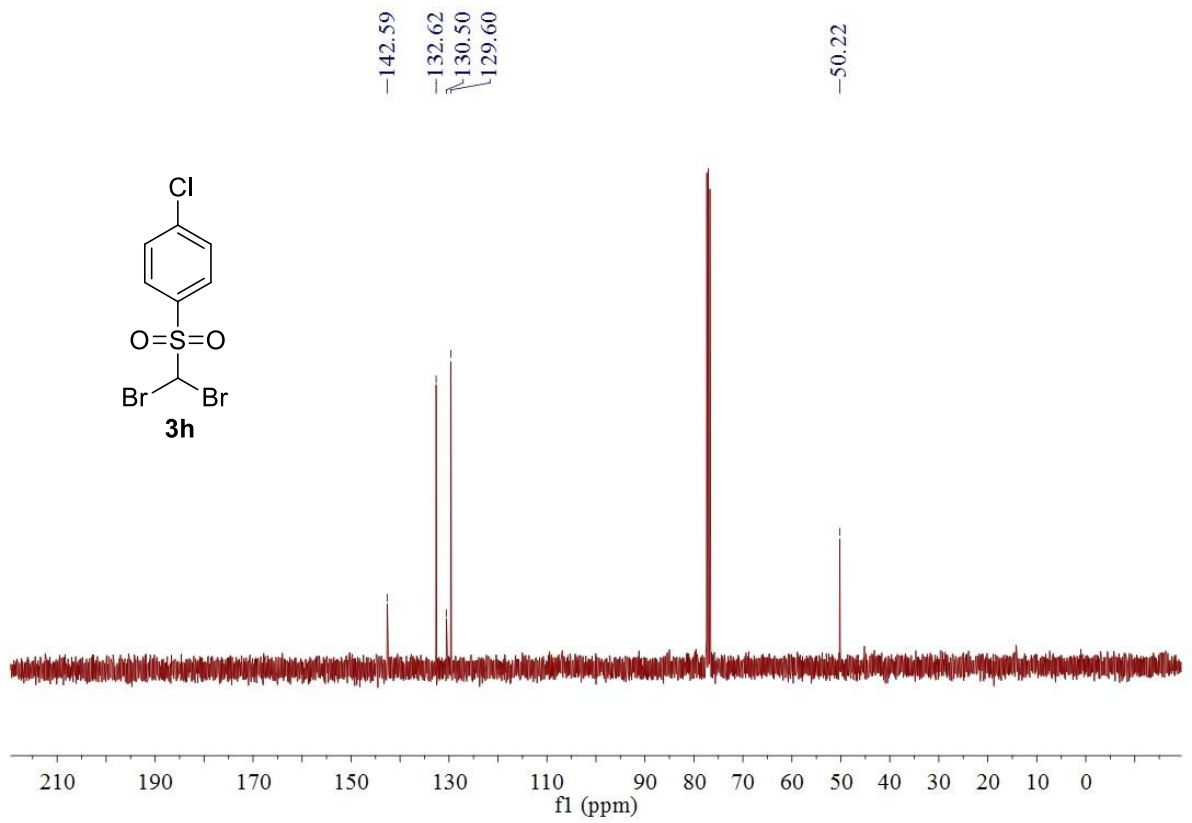

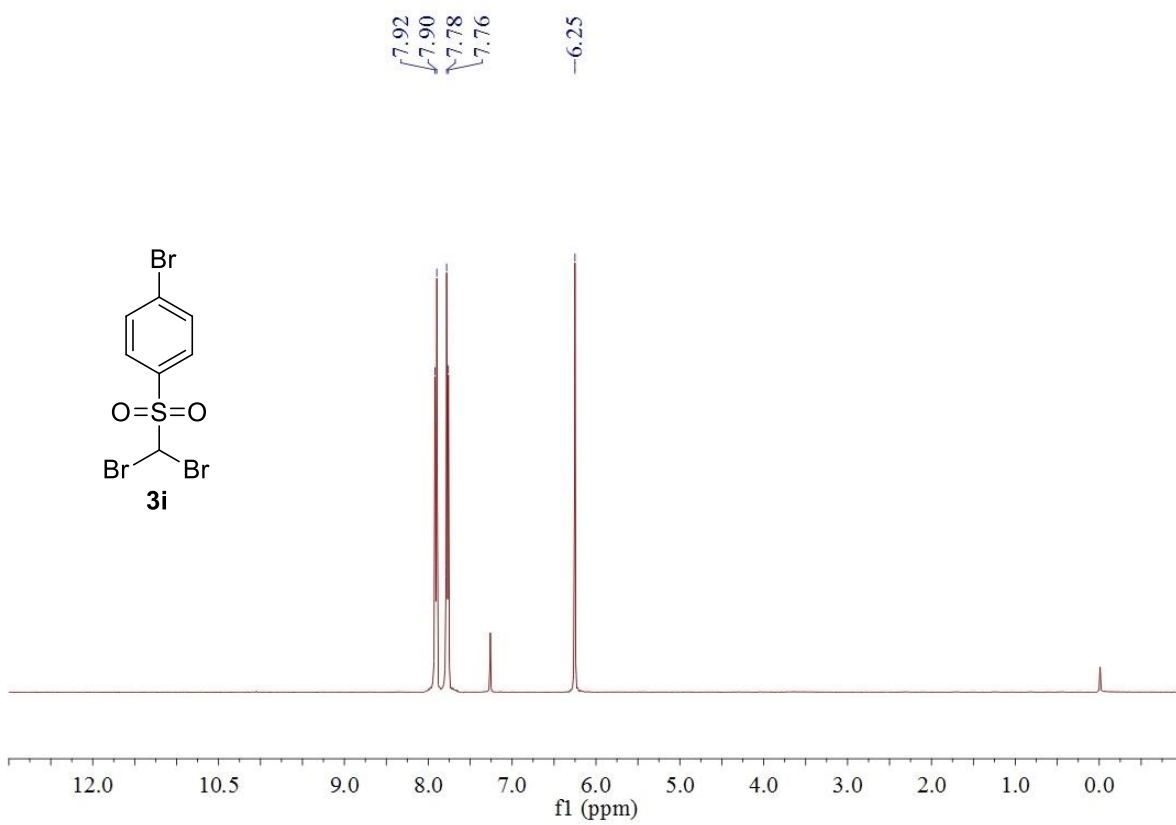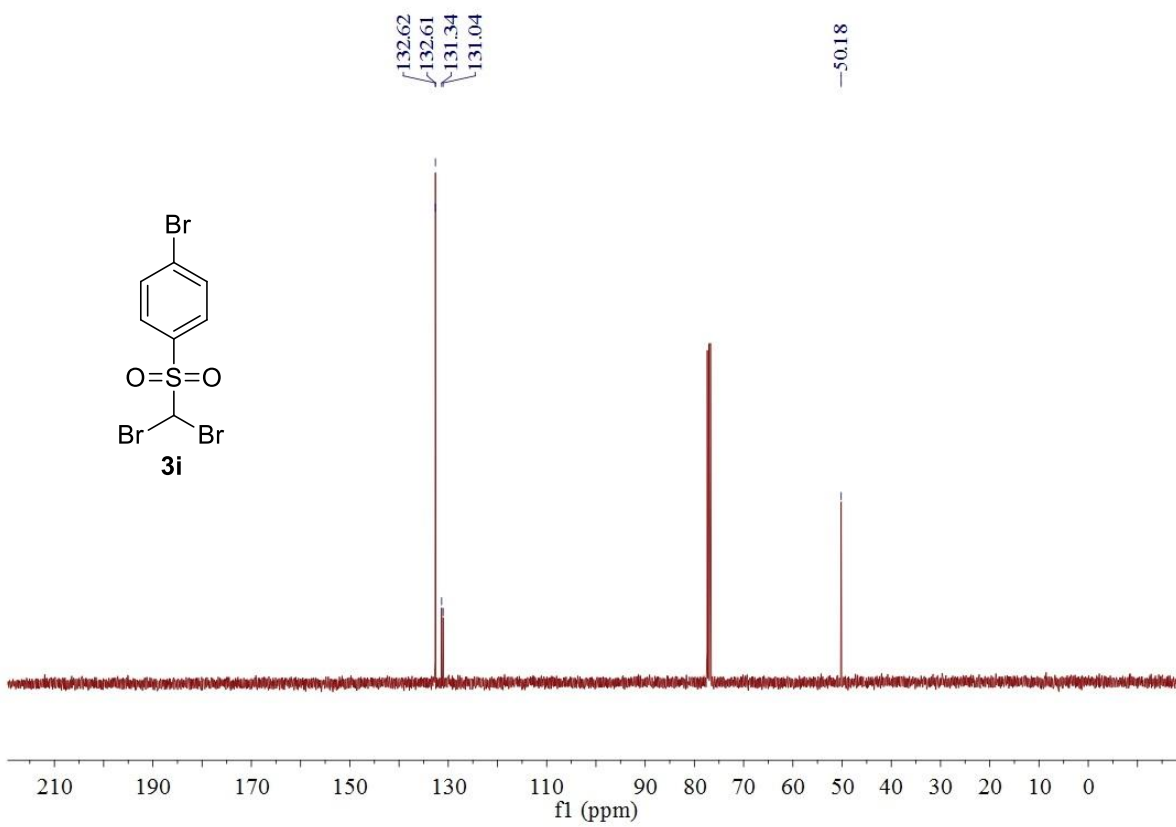



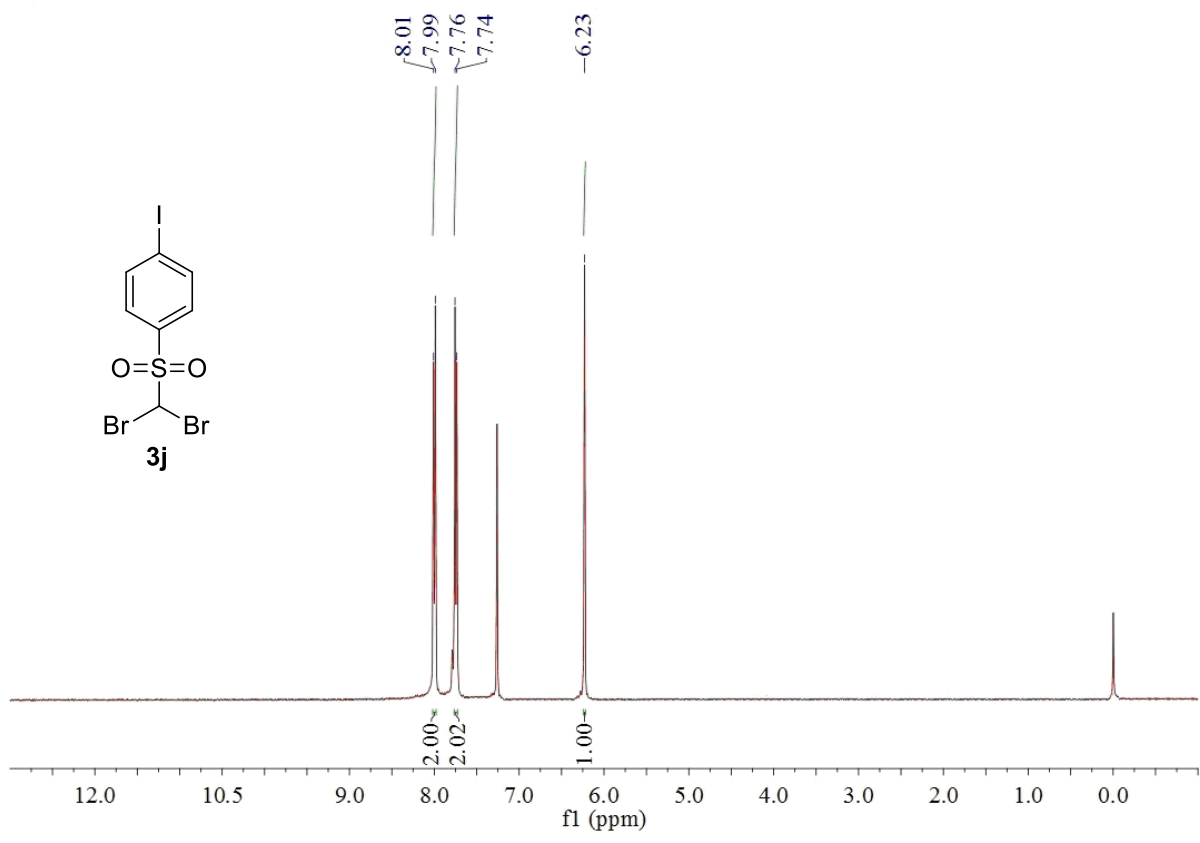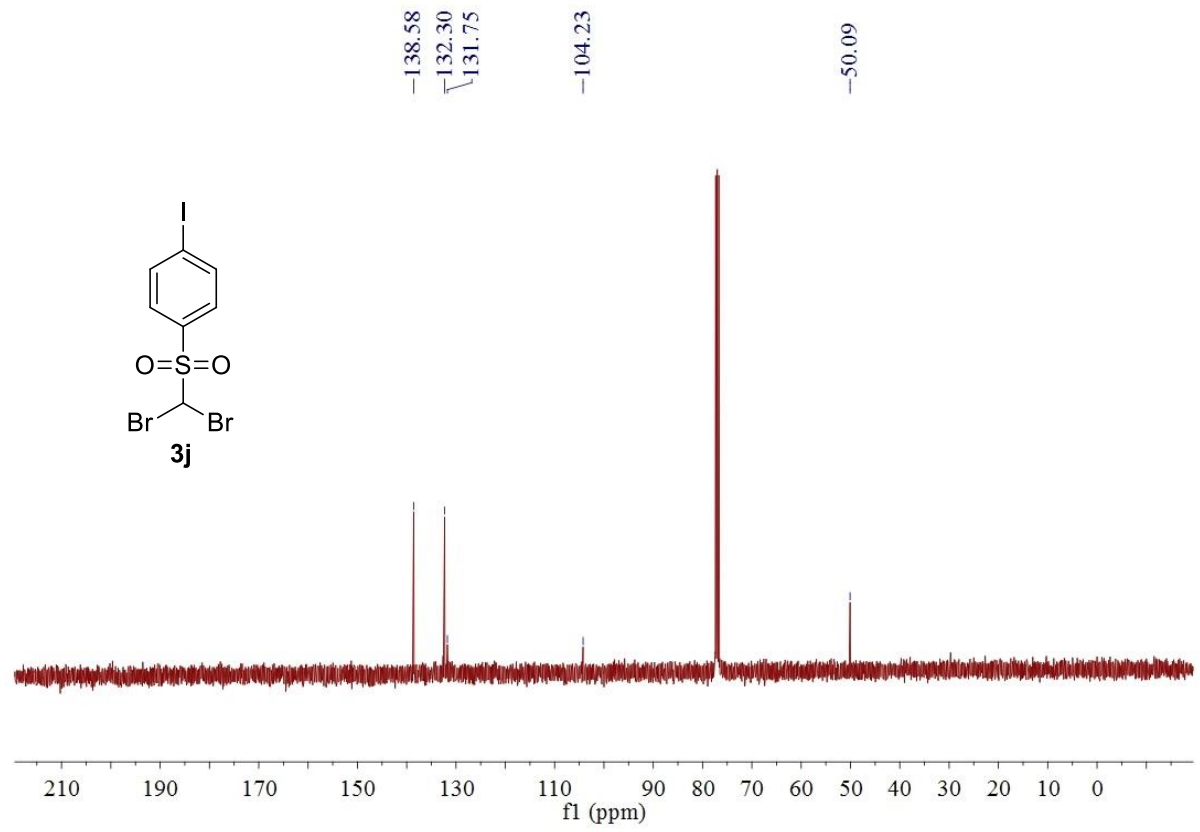

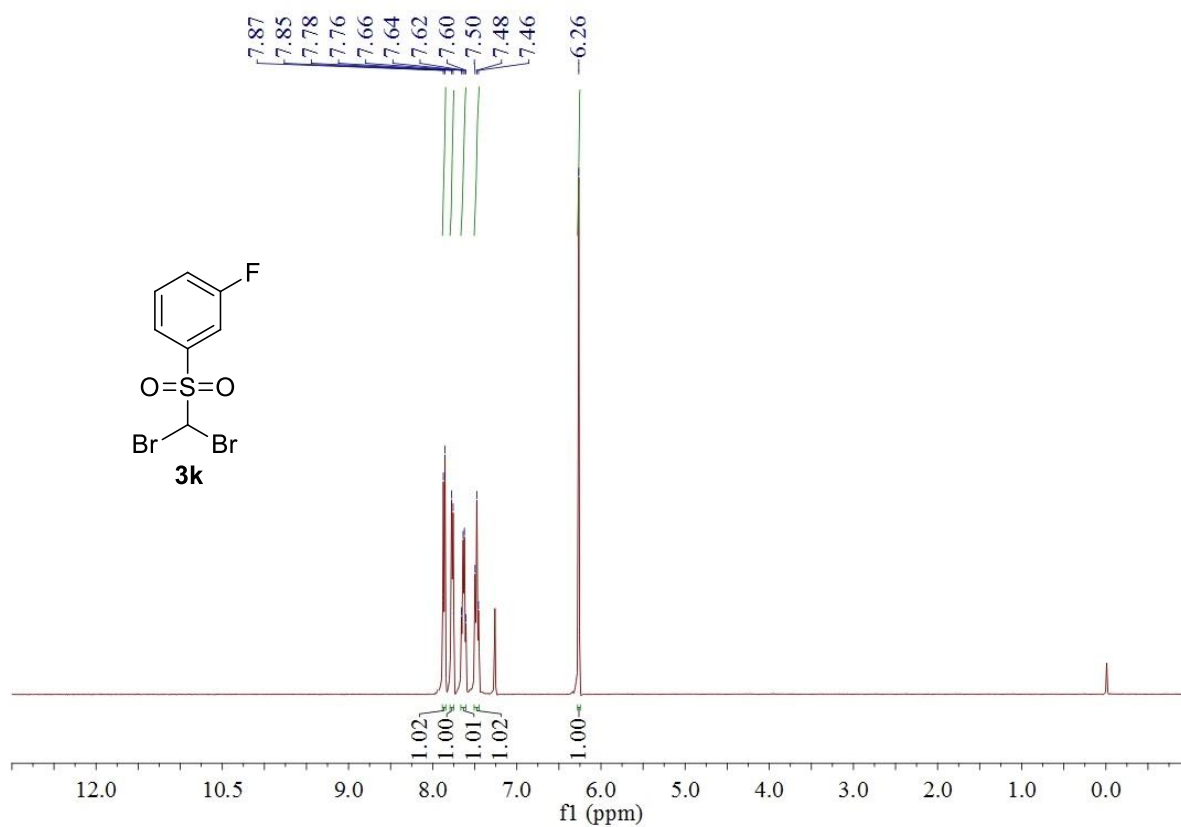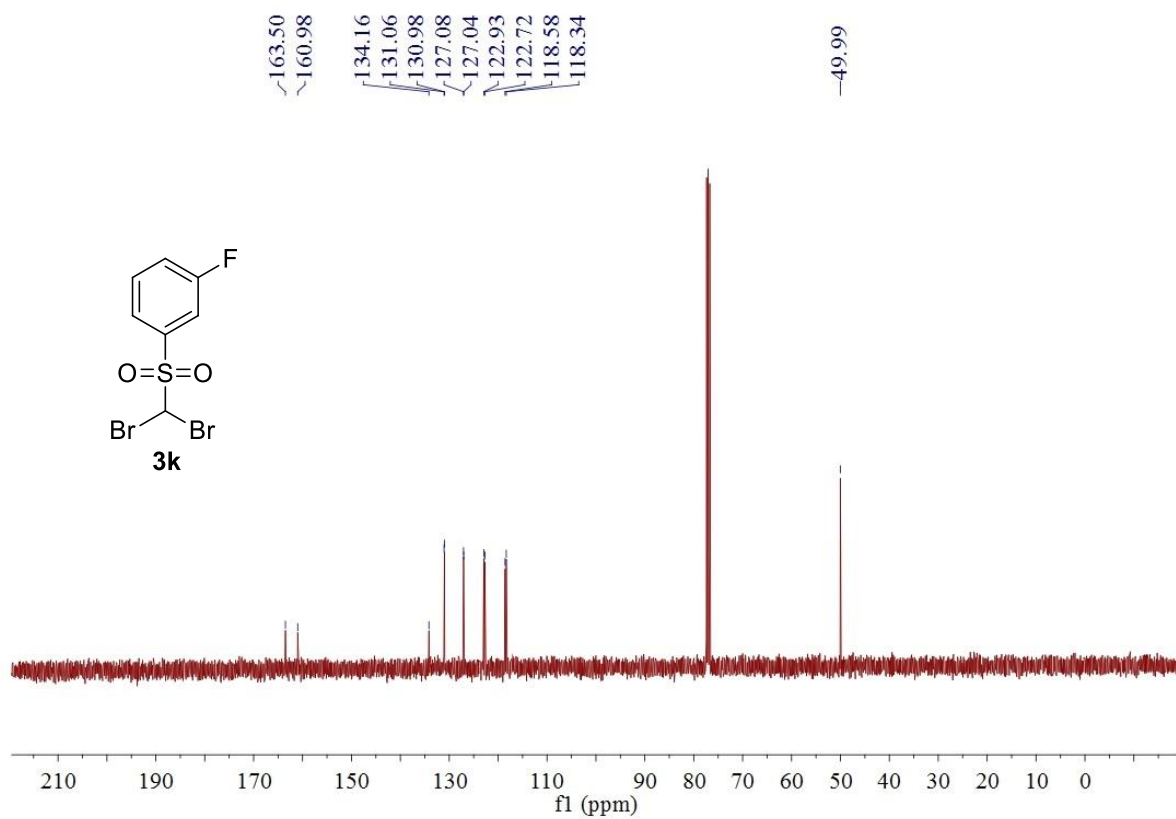

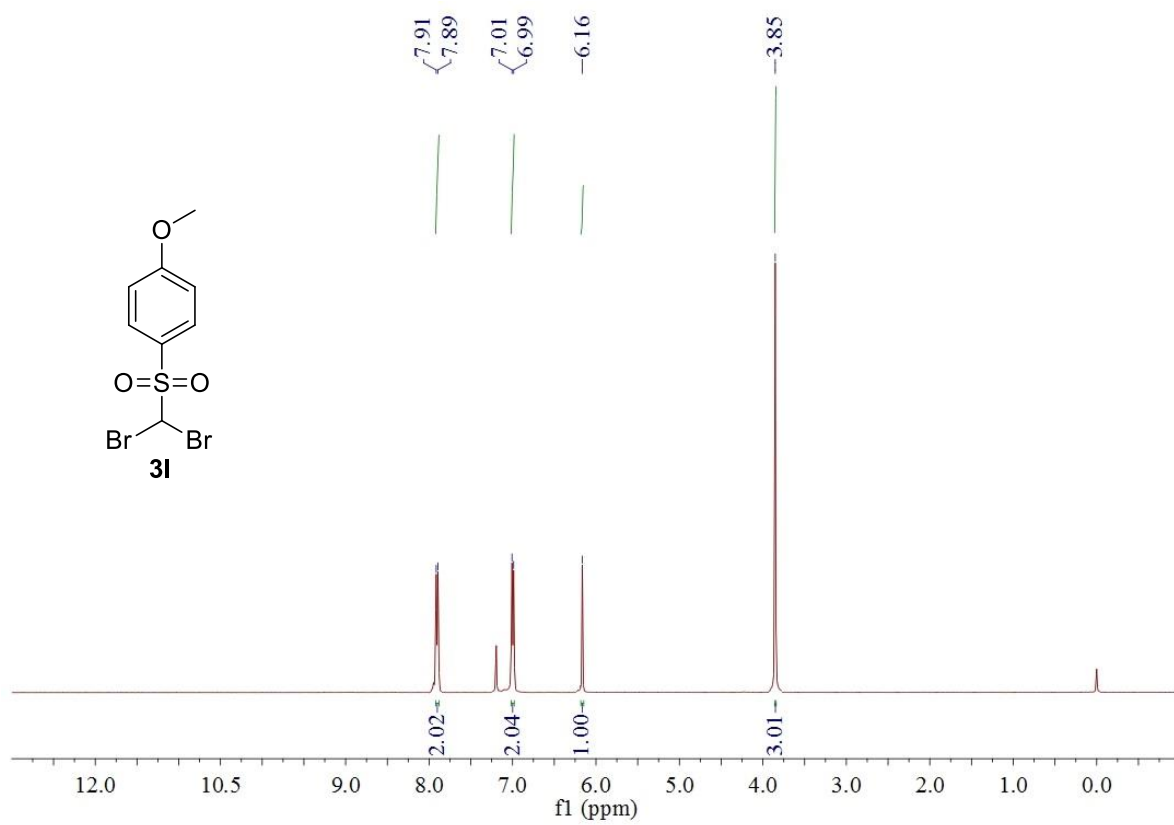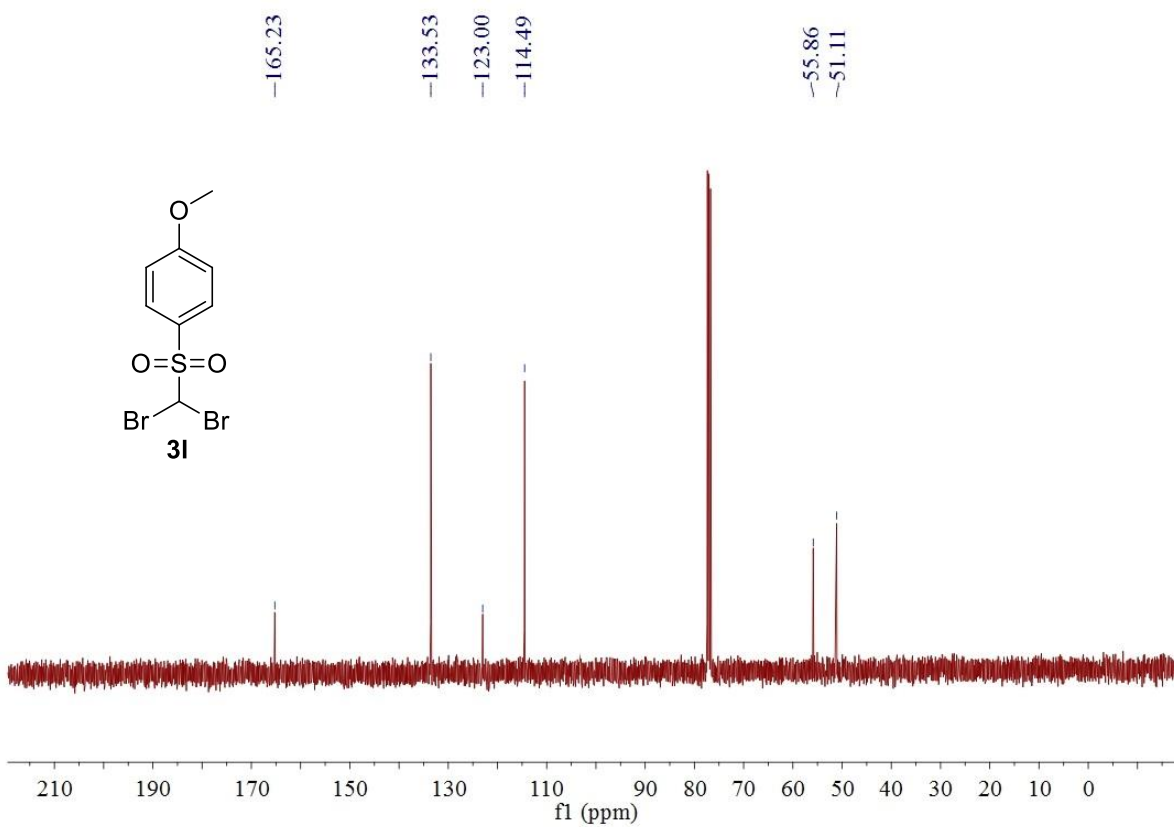

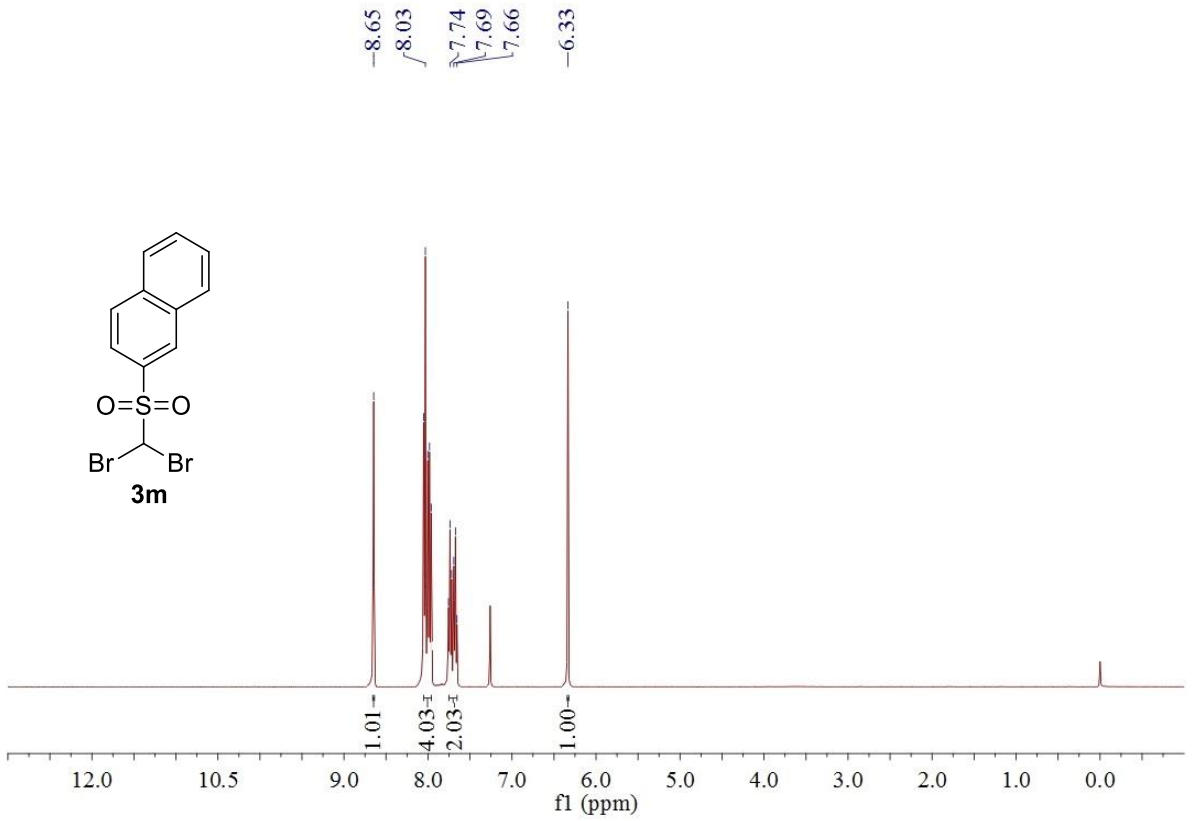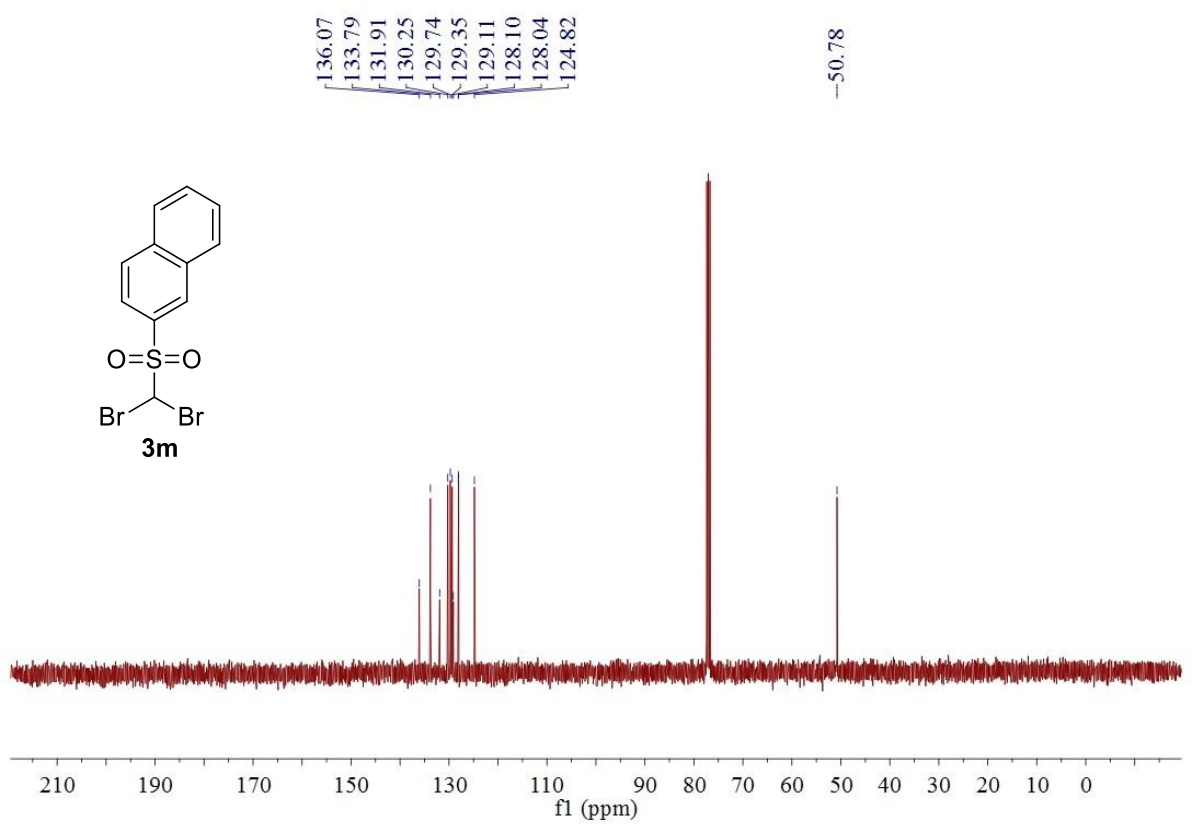

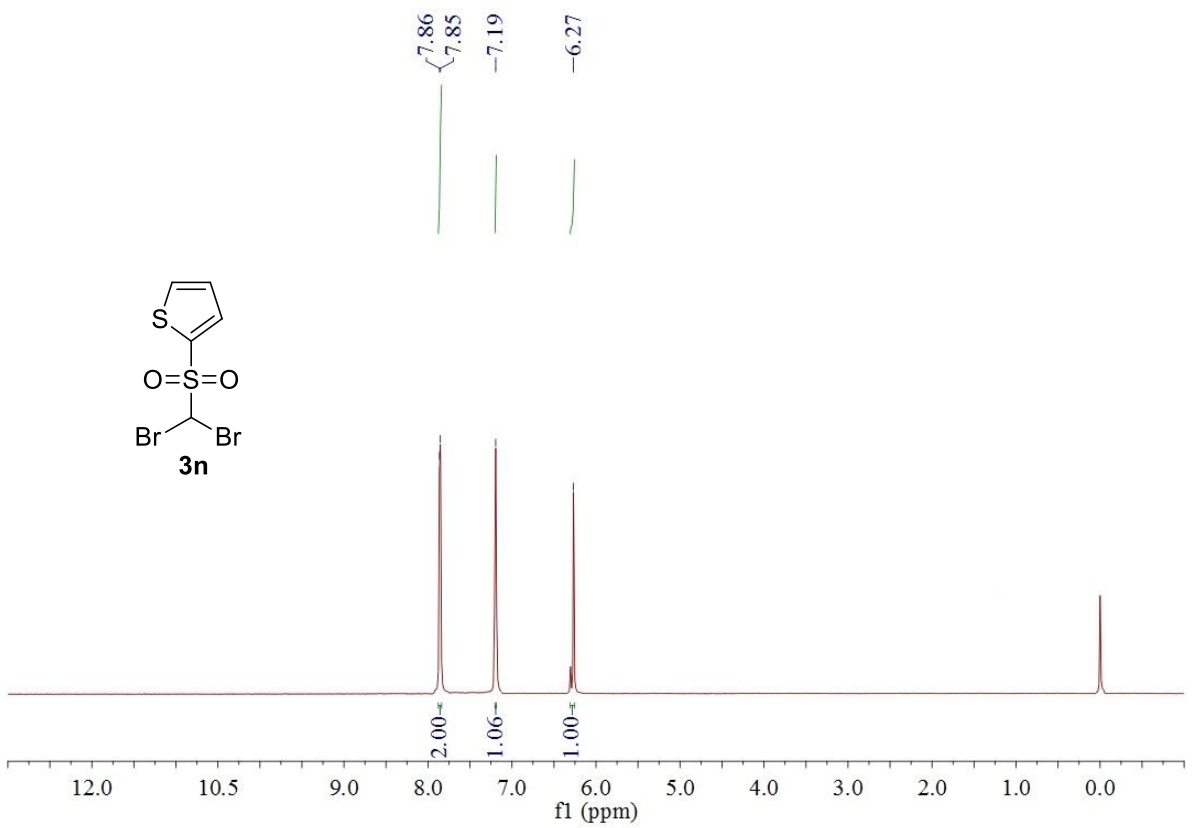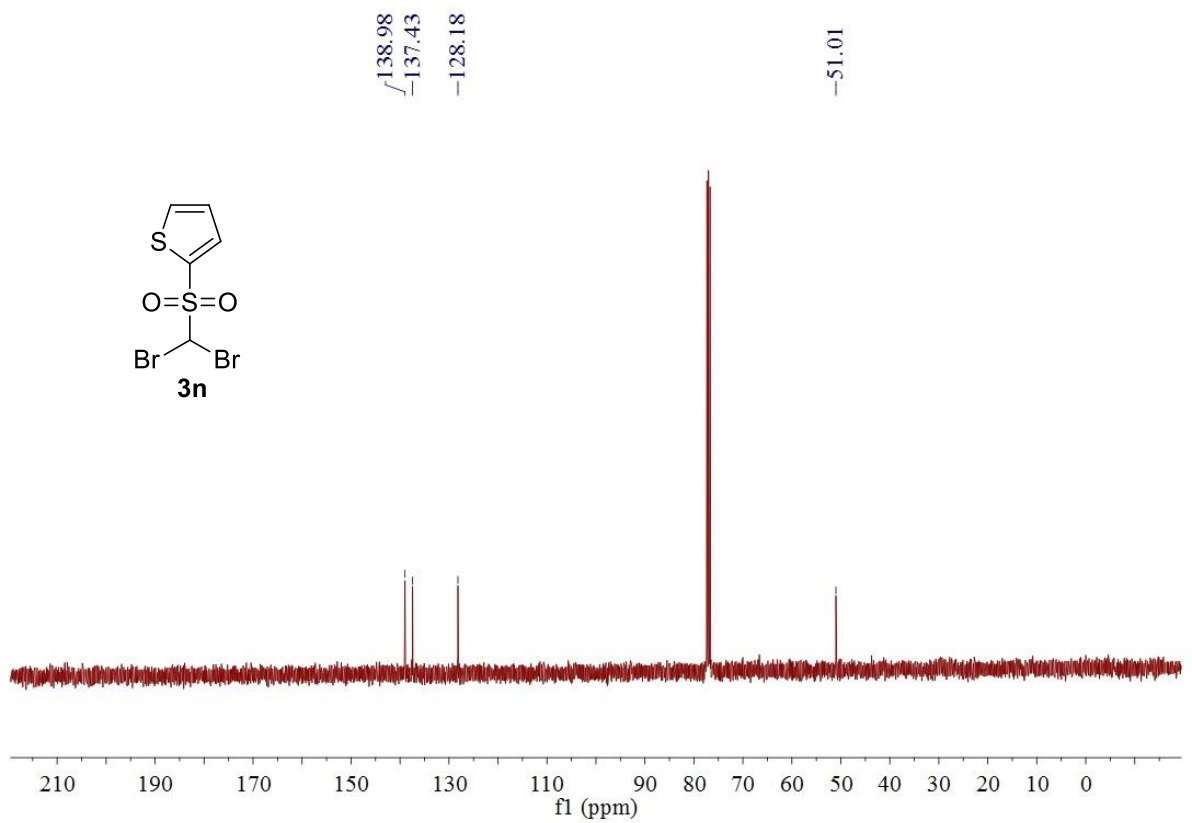

Supplement: c6ra01393g1.pdf [file c6ra01393g1.pdf]
